# Supplementary material for: Soil properties determine the elevational patterns of base cations andmicronutrients in plant-soil system up to the upper limits of trees and shrubs
Source: Copernicus journal article supplement (doi:10.5194/bg-2017-298), 2017-08-04
Supplement: Supplementary file 1 [file bg-2017-298-supplement.pdf]

**Table S1** Summary of the main characteristics of three study sites.

| Study sites  | Position                         | MAP<br>(mm) | Sampling elevation (m)  |                         | Dominant species         |                              | Soil type                   |
|--------------|----------------------------------|-------------|-------------------------|-------------------------|--------------------------|------------------------------|-----------------------------|
|              |                                  |             | Tree                    | Shrub                   | Tree                     | Shrub                        |                             |
| Balang Mts.  | 102°52'-103°24'E, 30°45'-31°25'N | 846         | 2860, 3290, and<br>3670 | 2840, 3160, and<br>3590 | <i>Abies faxoniana</i>   | <i>Quercus aquifolioides</i> | Umbric Cryic<br>Cambisols   |
| Qilian Mts.  | 102°58'-103°01'E, 37°14'-37°20'N | 435         | 2540, 2870, and<br>3250 | 3020, 3250, and<br>3540 | <i>Picea crassifolia</i> | <i>Salix gilashanica</i>     | Calcaric Ustic<br>Cambisols |
| Changbai Mt. | 126°55'-129°00'E, 41°23'-42°36'N | 632-1154    | 1700, 1860, and<br>2030 | 1430, 2000, and<br>2380 | <i>Betula ermanii</i>    | <i>Vaccinium uliginosum</i>  | Andic Gelic Cambisols       |

**Table S2** Correlation analyses (*R* values) of soil base cations and available micronutrients with soil physicochemical parameters of treeline or

5 shrubline for each sampling site.

|          |                              | Treeline     |                |             |              |             |              | Shrubline   |              |              |             |              |              |
|----------|------------------------------|--------------|----------------|-------------|--------------|-------------|--------------|-------------|--------------|--------------|-------------|--------------|--------------|
|          |                              | Ca           | Mg             | K           | Fe           | Mn          | Zn           | Ca          | Mg           | K            | Fe          | Mn           | Zn           |
| Balang   | pH                           | <b>0.47</b>  | 0.37           | 0.54*       | 0.05         | -0.13       | -0.35        | 0.87**      | -0.13        | -0.56*       | -0.60**     | <b>-0.40</b> | <b>-0.43</b> |
|          | SOC                          | 0.31         | <b>0.47</b>    | 0.40        | 0.64**       | 0.67**      | 0.78**       | <b>0.43</b> | 0.63**       | -0.18        | 0.15        | -0.08        | 0.36         |
|          | TN                           | 0.34         | 0.49*          | 0.35        | 0.57*        | 0.68**      | 0.72**       | 0.55*       | 0.57*        | -0.25        | -0.07       | -0.19        | 0.26         |
|          | C:N                          | 0.04         | 0.09           | 0.27        | 0.34         | 0.12        | 0.27         | -0.52*      | 0.00         | 0.29         | 0.72**      | 0.34         | 0.23         |
|          | NO <sub>3</sub> <sup>-</sup> | 0.52*        | 0.51*          | 0.63**      | 0.38         | 0.11        | 0.16         | 0.62**      | -0.16        | -0.51*       | -0.35       | -0.17        | 0.10         |
|          | NH <sub>4</sub> <sup>+</sup> | 0.08         | 0.08           | -0.21       | 0.02         | <b>0.43</b> | 0.02         | 0.00        | 0.07         | 0.22         | 0.13        | 0.37         | 0.07         |
|          | TIN                          | 0.55*        | 0.54*          | 0.51*       | 0.39         | 0.33        | 0.16         | 0.61**      | -0.15        | -0.48*       | -0.34       | -0.14        | 0.10         |
| Qilian   | Olsen P                      | <b>0.40</b>  | <b>0.67</b> ** | 0.54*       | 0.29         | 0.31        | 0.49*        | -0.21       | -0.08        | 0.37         | 0.24        | -0.09        | -0.28        |
|          | pH                           | -0.85**      | -0.79**        | 0.63**      | <b>-0.43</b> | -0.12       | -0.40        | -0.07       | 0.07         | 0.38         | 0.35        | 0.49*        | -0.13        |
|          | SOC                          | 0.59*        | 0.60**         | -0.36       | 0.08         | -0.09       | 0.22         | 0.64**      | <b>0.45</b>  | -0.37        | -0.20       | -0.25        | 0.10         |
|          | TN                           | 0.95**       | 0.94**         | -0.72**     | 0.63**       | 0.38        | <b>0.46</b>  | 0.01        | 0.09         | 0.22         | -0.03       | -0.35        | 0.01         |
|          | C:N                          | -0.52*       | -0.49*         | 0.53*       | -0.70**      | -0.57*      | -0.32        | 0.79**      | 0.48*        | -0.63**      | -0.21       | -0.04        | 0.07         |
|          | NO <sub>3</sub> <sup>-</sup> | -0.48*       | -0.38          | 0.32        | -0.18        | -0.12       | -0.39        | -0.51*      | -0.01        | 0.32         | 0.26        | 0.28         | -0.05        |
|          | NH <sub>4</sub> <sup>+</sup> | 0.19         | 0.30           | -0.19       | 0.24         | 0.36        | 0.32         | <b>0.46</b> | 0.13         | 0.03         | -0.33       | -0.30        | -0.09        |
| Changbai | TIN                          | <b>-0.43</b> | -0.31          | 0.27        | -0.12        | -0.04       | -0.30        | -0.26       | 0.10         | <b>0.44</b>  | 0.04        | 0.10         | -0.14        |
|          | Olsen P                      | 0.48*        | 0.53*          | -0.28       | 0.20         | 0.12        | 0.47*        | -0.33       | -0.25        | 0.67**       | <b>0.46</b> | 0.39         | -0.14        |
|          | pH                           | 0.03         | -0.22          | 0.13        | -0.57*       | <b>0.41</b> | 0.15         | 0.66*       | 0.49*        | <b>-0.46</b> | -0.53*      | 0.65**       | <b>0.41</b>  |
|          | SOC                          | -0.09        | 0.15           | 0.56*       | 0.91**       | -0.57*      | 0.07         | 0.67**      | 0.83**       | 0.36         | 0.61**      | <b>0.41</b>  | 0.54*        |
|          | TN                           | <b>0.43</b>  | 0.65**         | <b>0.44</b> | 0.71**       | -0.32       | <b>0.43</b>  | 0.78**      | 0.88**       | 0.22         | 0.47*       | 0.53*        | 0.55*        |
|          | C:N                          | -0.70**      | -0.58*         | <b>0.42</b> | 0.66**       | -0.61**     | <b>-0.42</b> | -0.48*      | -0.50*       | 0.09         | 0.06        | <b>-0.40</b> | -0.24        |
|          | NO <sub>3</sub> <sup>-</sup> | -0.07        | -0.20          | -0.32       | -0.21        | 0.18        | -0.12        | -0.25       | -0.32        | 0.02         | -0.07       | -0.30        | -0.16        |
| Changbai | NH <sub>4</sub> <sup>+</sup> | 0.09         | 0.19           | 0.61**      | -0.07        | -0.29       | 0.49*        | -0.29       | <b>-0.43</b> | -0.09        | -0.32       | -0.22        | -0.20        |
|          | TIN                          | -0.03        | -0.11          | -0.08       | -0.23        | 0.06        | 0.07         | -0.28       | -0.37        | -0.02        | -0.15       | -0.29        | -0.18        |
|          | Olsen P                      | 0.01         | 0.12           | 0.49*       | 0.18         | 0.04        | <b>0.44</b>  | 0.27        | 0.48*        | 0.49*        | 0.17        | 0.20         | 0.34         |

\* and \*\* indicate significant level at  $P < 0.05$  and  $0.01$ , respectively. Bold type represents  $P < 0.1$ .

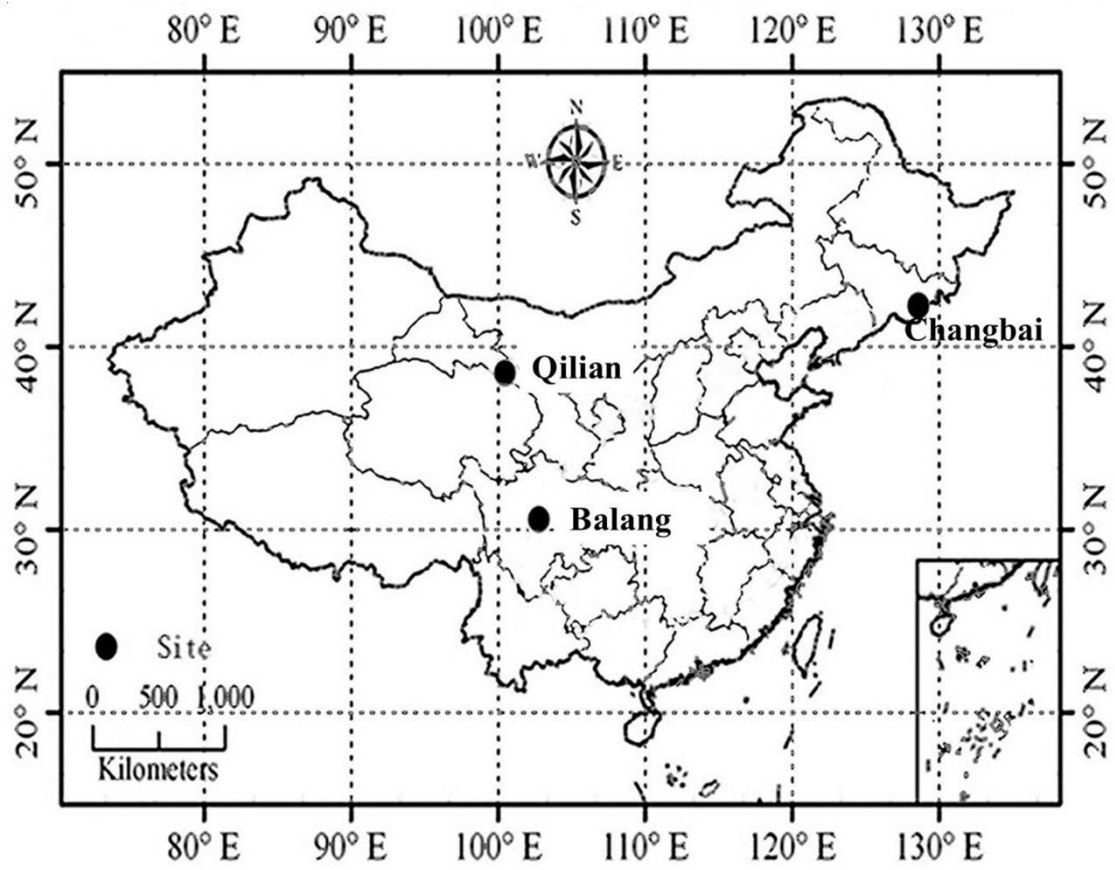

**Fig. S1** Location of three sampling sites.

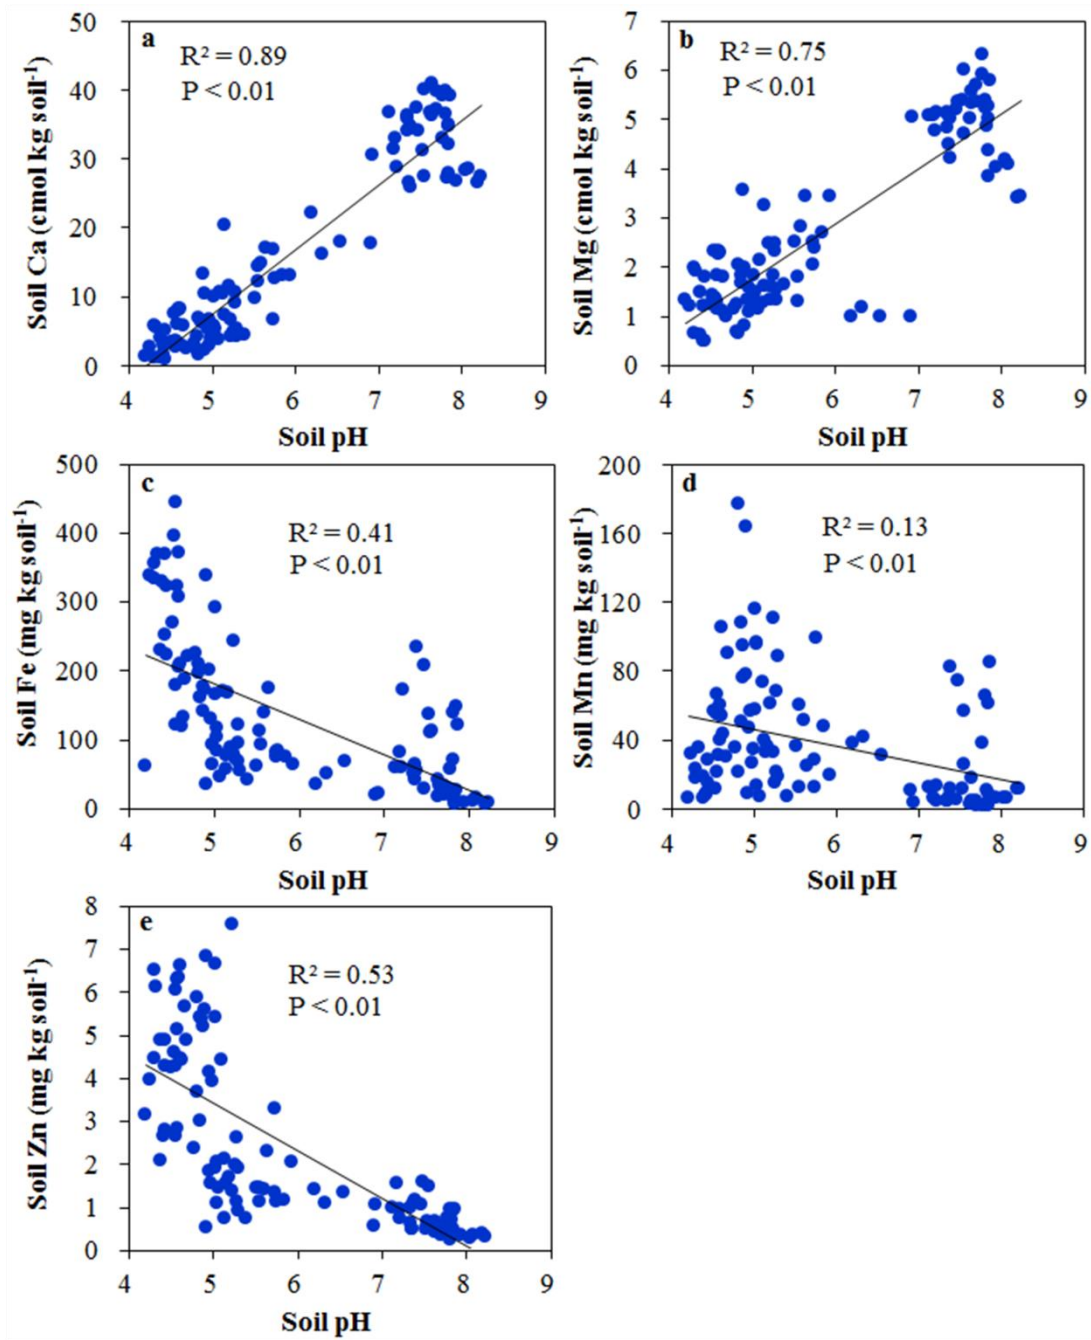

10

**Fig. S2** Correlation analyses between soil pH and soil exchangeable base cations of Ca (a) and Mg (b) and available micronutrients of Fe (c), Mn (d) and Zn (e) under trees and shrubs across three sampling sites.

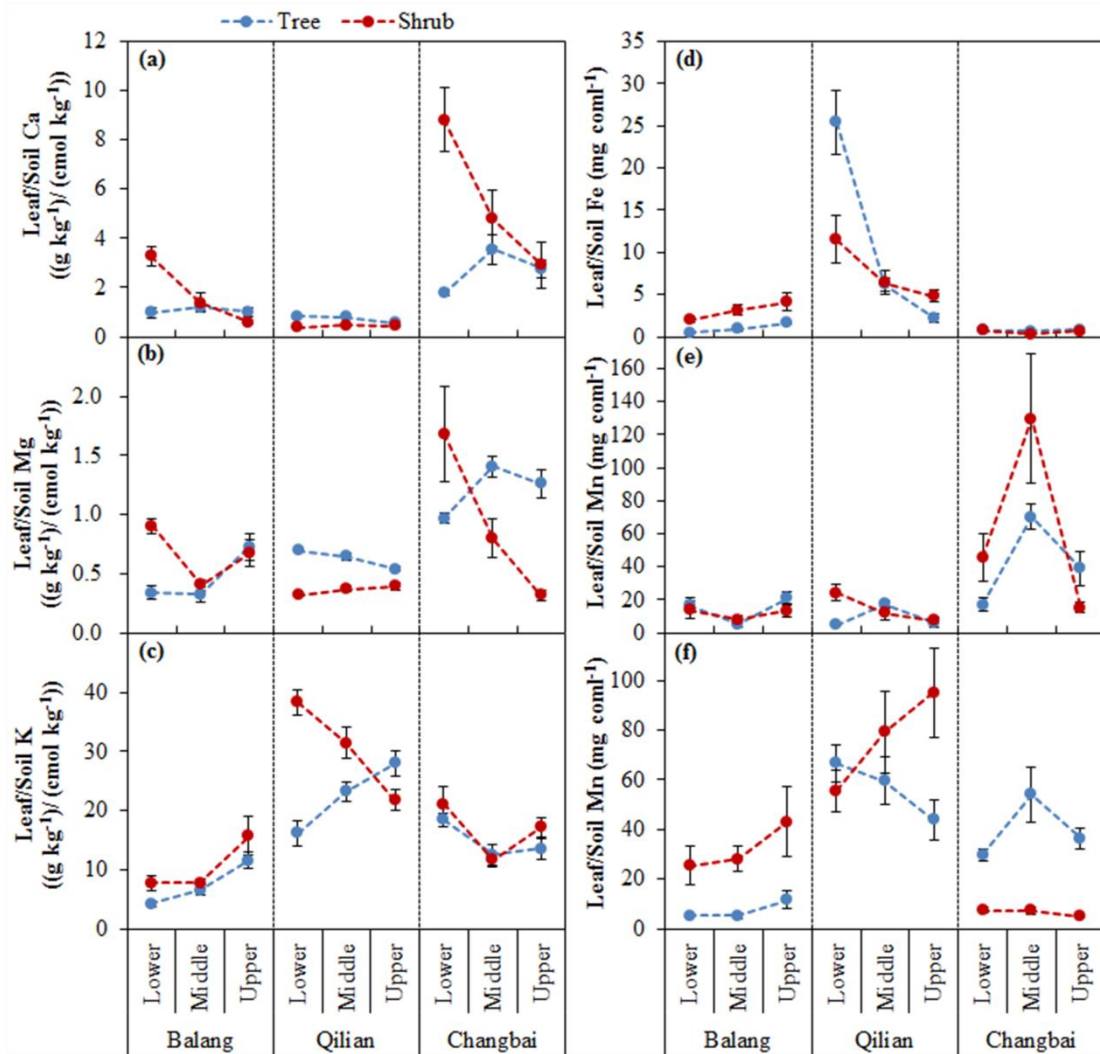

15

**Fig. S3** The ratio of nutrient concentrations of Ca (a), Mg (b), K (c), Fe (d), Mn (e) and Zn (f) in plant leaves to their availabilities in soils at lower and middle elevations as well as at the upper limit of trees or shrubs for each of the three sites.

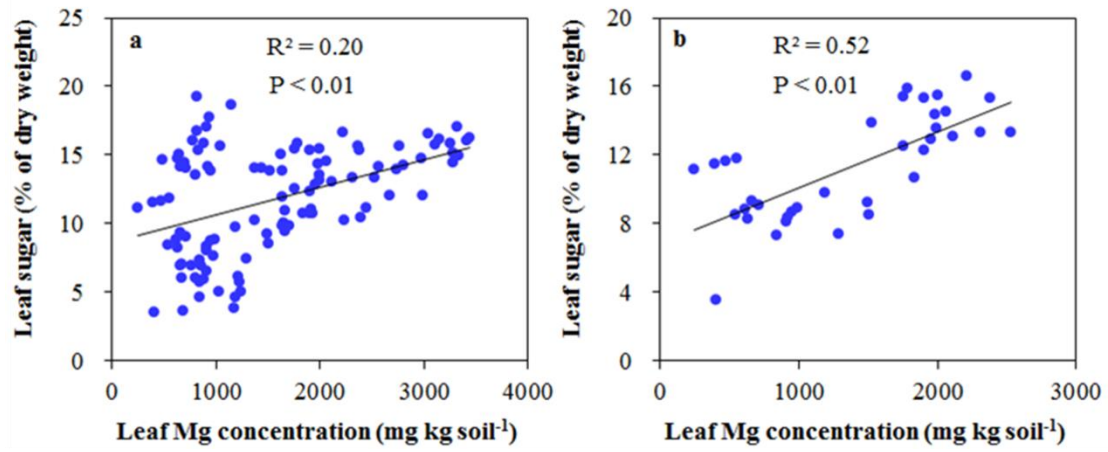

20

**Fig. S4** Correlation analyses between Mg concentration and soluble sugar contents across three sampling sites (a) and at Changbai (b).
