# Supplementary material for: Soil properties determine the elevational patterns of base cations andmicronutrients in plant-soil system up to the upper limits of trees and shrubs
Source: Copernicus journal article supplement (doi:10.5194/bg-2017-298), 2017-08-04
Supplement: Supplementary file [file bg-2017-298-AC1-supplement.pdf]

**Table S1** Summary of the main characteristics of three study sites.

| Study sites       | Position                                 | Soil parent material | Bedrock      | MAP (mm)   | MAT (°C)   | Sampling elevation (m) |                |       | Dominant species         |                              | Soil type          |       |
|-------------------|------------------------------------------|----------------------|--------------|------------|------------|------------------------|----------------|-------|--------------------------|------------------------------|--------------------|-------|
|                   |                                          |                      |              |            |            | Tree                   | Shrub          |       | Tree                     | Shrub                        |                    |       |
| Subtropical Mt.   | 102°52' -103°24' E, 8.4°30'45' -31°25' N | Moraines sediments   | limestone    | 883 – 1146 | 2.8 – 5.8  | 2860, 3290, and 3670   | 2840, and 3590 | 3160, | <i>Abies faxoniana</i>   | <i>Quercus aquifolioides</i> | Umbric Cambisols   | Cryic |
| Dry-temperate Mt. | 102°58' -103°01' E, 37°14' -37°20' N     | Slope deposit        | conglomerate | 363 – 550  | -4.6 – 1.6 | 2540, 2870, and 3250   | 3020, and 3540 | 3250, | <i>Picea crassifolia</i> | <i>Salix gilashanica</i>     | Calcaric Cambisols | Ustic |
| Wet-temperate Mt. | 126°55' -129°00' E, 41°23' -42°36' N     | Alluvial deposit     | trachyte     | 811 – 1154 | -4.8 – 0.3 | 1700, 1860, and 2030   | 1430, and 2380 | 2000, | <i>Betula ermanii</i>    | <i>Vaccinium uliginosum</i>  | Andic Cambisols    | Gelic |

**Table S2** Correlation analyses (*R* values) of soil base cations and available micronutrients with soil physicochemical parameters of treeline or

5 shrubline for each sampling site.

|                   |                              | Treeline     |                |             |              |             |              | Shrubline   |              |              |             |              |              |
|-------------------|------------------------------|--------------|----------------|-------------|--------------|-------------|--------------|-------------|--------------|--------------|-------------|--------------|--------------|
|                   |                              | Ca           | Mg             | K           | Fe           | Mn          | Zn           | Ca          | Mg           | K            | Fe          | Mn           | Zn           |
| Subtropical Mt.   | pH                           | <b>0.47</b>  | 0.37           | 0.54*       | 0.05         | -0.13       | -0.35        | 0.87**      | -0.13        | -0.56*       | -0.60**     | <b>-0.40</b> | <b>-0.43</b> |
|                   | SOC                          | 0.31         | <b>0.47</b>    | 0.40        | 0.64**       | 0.67**      | 0.78**       | <b>0.43</b> | 0.63**       | -0.18        | 0.15        | -0.08        | 0.36         |
|                   | TN                           | 0.34         | 0.49*          | 0.35        | 0.57*        | 0.68**      | 0.72**       | 0.55*       | 0.57*        | -0.25        | -0.07       | -0.19        | 0.26         |
|                   | C:N                          | 0.04         | 0.09           | 0.27        | 0.34         | 0.12        | 0.27         | -0.52*      | 0.00         | 0.29         | 0.72**      | 0.34         | 0.23         |
|                   | NO <sub>3</sub> <sup>-</sup> | 0.52*        | 0.51*          | 0.63**      | 0.38         | 0.11        | 0.16         | 0.62**      | -0.16        | -0.51*       | -0.35       | -0.17        | 0.10         |
|                   | NH <sub>4</sub> <sup>+</sup> | 0.08         | 0.08           | -0.21       | 0.02         | <b>0.43</b> | 0.02         | 0.00        | 0.07         | 0.22         | 0.13        | 0.37         | 0.07         |
|                   | TIN                          | 0.55*        | 0.54*          | 0.51*       | 0.39         | 0.33        | 0.16         | 0.61**      | -0.15        | -0.48*       | -0.34       | -0.14        | 0.10         |
|                   | Olsen P                      | <b>0.40</b>  | <b>0.67</b> ** | 0.54*       | 0.29         | 0.31        | 0.49*        | -0.21       | -0.08        | 0.37         | 0.24        | -0.09        | -0.28        |
| Dry-temperate Mt. | pH                           | -0.85**      | -0.79**        | 0.63**      | <b>-0.43</b> | -0.12       | -0.40        | -0.07       | 0.07         | 0.38         | 0.35        | 0.49*        | -0.13        |
|                   | SOC                          | 0.59*        | 0.60**         | -0.36       | 0.08         | -0.09       | 0.22         | 0.64**      | <b>0.45</b>  | -0.37        | -0.20       | -0.25        | 0.10         |
|                   | TN                           | 0.95**       | 0.94**         | -0.72**     | 0.63**       | 0.38        | <b>0.46</b>  | 0.01        | 0.09         | 0.22         | -0.03       | -0.35        | 0.01         |
|                   | C:N                          | -0.52*       | -0.49*         | 0.53*       | -0.70**      | -0.57*      | -0.32        | 0.79**      | 0.48*        | -0.63**      | -0.21       | -0.04        | 0.07         |
|                   | NO <sub>3</sub> <sup>-</sup> | -0.48*       | -0.38          | 0.32        | -0.18        | -0.12       | -0.39        | -0.51*      | -0.01        | 0.32         | 0.26        | 0.28         | -0.05        |
|                   | NH <sub>4</sub> <sup>+</sup> | 0.19         | 0.30           | -0.19       | 0.24         | 0.36        | 0.32         | <b>0.46</b> | 0.13         | 0.03         | -0.33       | -0.30        | -0.09        |
|                   | TIN                          | <b>-0.43</b> | -0.31          | 0.27        | -0.12        | -0.04       | -0.30        | -0.26       | 0.10         | <b>0.44</b>  | 0.04        | 0.10         | -0.14        |
|                   | Olsen P                      | 0.48*        | 0.53*          | -0.28       | 0.20         | 0.12        | 0.47*        | -0.33       | -0.25        | 0.67**       | <b>0.46</b> | 0.39         | -0.14        |
| Wet-temperate Mt. | pH                           | 0.03         | -0.22          | 0.13        | -0.57*       | <b>0.41</b> | 0.15         | 0.66*       | 0.49*        | <b>-0.46</b> | -0.53*      | 0.65**       | <b>0.41</b>  |
|                   | SOC                          | -0.09        | 0.15           | 0.56*       | 0.91**       | -0.57*      | 0.07         | 0.67**      | 0.83**       | 0.36         | 0.61**      | <b>0.41</b>  | 0.54*        |
|                   | TN                           | <b>0.43</b>  | 0.65**         | <b>0.44</b> | 0.71**       | -0.32       | <b>0.43</b>  | 0.78**      | 0.88**       | 0.22         | 0.47*       | 0.53*        | 0.55*        |
|                   | C:N                          | -0.70**      | -0.58*         | <b>0.42</b> | 0.66**       | -0.61**     | <b>-0.42</b> | -0.48*      | -0.50*       | 0.09         | 0.06        | <b>-0.40</b> | -0.24        |
|                   | NO <sub>3</sub> <sup>-</sup> | -0.07        | -0.20          | -0.32       | -0.21        | 0.18        | -0.12        | -0.25       | -0.32        | 0.02         | -0.07       | -0.30        | -0.16        |
|                   | NH <sub>4</sub> <sup>+</sup> | 0.09         | 0.19           | 0.61**      | -0.07        | -0.29       | 0.49*        | -0.29       | <b>-0.43</b> | -0.09        | -0.32       | -0.22        | -0.20        |
|                   | TIN                          | -0.03        | -0.11          | -0.08       | -0.23        | 0.06        | 0.07         | -0.28       | -0.37        | -0.02        | -0.15       | -0.29        | -0.18        |
|                   | Olsen P                      | 0.01         | 0.12           | 0.49*       | 0.18         | 0.04        | <b>0.44</b>  | 0.27        | 0.48*        | 0.49*        | 0.17        | 0.20         | 0.34         |

\* and \*\* indicate significant level at  $P < 0.05$  and  $0.01$ , respectively. Bold type represents  $P < 0.1$ .

**Table S3** Correlation analyses for base cations and available micronutrients in soil and plant tissues of leaf, root, shoot and stem sapwood across sampling sites, plant life form and elevation position.

| Base cations and micronutrients | Correlation analyses |         |         |          |        |
|---------------------------------|----------------------|---------|---------|----------|--------|
| Ca                              | Soil Ca              | Leaf Ca | Root Ca | Shoot Ca |        |
|                                 | Leaf Ca              | 0.60**  |         |          |        |
|                                 | Root Ca              | 0.56**  | 0.37**  |          |        |
|                                 | Shoot Ca             | 0.56**  | 0.37**  | 0.54**   |        |
|                                 | Stem Ca              | 0.56**  | -0.01   | 0.24*    | 0.43** |
| Mg                              | Soil Mg              | Leaf Mg | Root Mg | Shoot Mg |        |
|                                 | Leaf Mg              | 0.66**  |         |          |        |
|                                 | Root Mg              | 0.10    | -0.09   |          |        |
|                                 | Shoot Mg             | 0.44**  | 0.44**  | 0.21*    |        |
|                                 | Stem Mg              | 0.10    | -0.41** | 0.17     | -0.09  |
| K                               | Soil K               | Leaf K  | Root K  | Shoot K  |        |
|                                 | Leaf K               | -0.06   |         |          |        |
|                                 | Root K               | 0.34**  | -0.08   |          |        |
|                                 | Shoot K              | 0.32**  | 0.07    | 0.44**   |        |
|                                 | Stem K               | 0.21*   | -0.46** | 0.55**   | 0.20*  |
| Fe                              | Soil Fe              | Leaf Fe | Root Fe | Shoot Fe |        |
|                                 | Leaf Fe              | -0.17   |         |          |        |
|                                 | Root Fe              | -0.07   | 0.37**  |          |        |
|                                 | Shoot Fe             | -0.43** | 0.38**  | 0.27**   |        |
|                                 | Stem Fe              | -0.39** | 0.35**  | 0.13     | 0.53** |
| Mn                              | Soil Mn              | Leaf Mn | Root Mn | Shoot Mn |        |
|                                 | Leaf Mn              | 0.30**  |         |          |        |
|                                 | Root Mn              | 0.28**  | 0.67**  |          |        |
|                                 | Shoot Mn             | 0.35**  | 0.61**  | 0.89**   |        |
|                                 | Stem Mn              | 0.32**  | 0.46**  | 0.19*    | 0.22*  |
| Zn                              | Soil Zn              | Leaf Zn | Root Zn | Shoot Zn |        |
|                                 | Leaf Zn              | 0.52**  |         |          |        |
|                                 | Root Zn              | 0.57**  | 0.69**  |          |        |
|                                 | Shoot Zn             | 0.62**  | 0.86**  | 0.88**   |        |
|                                 | Stem Zn              | 0.44**  | 0.11    | 0.53**   | 0.48** |

10 \* and \*\* indicate significant level at  $P < 0.05$  and  $0.01$ , respectively.

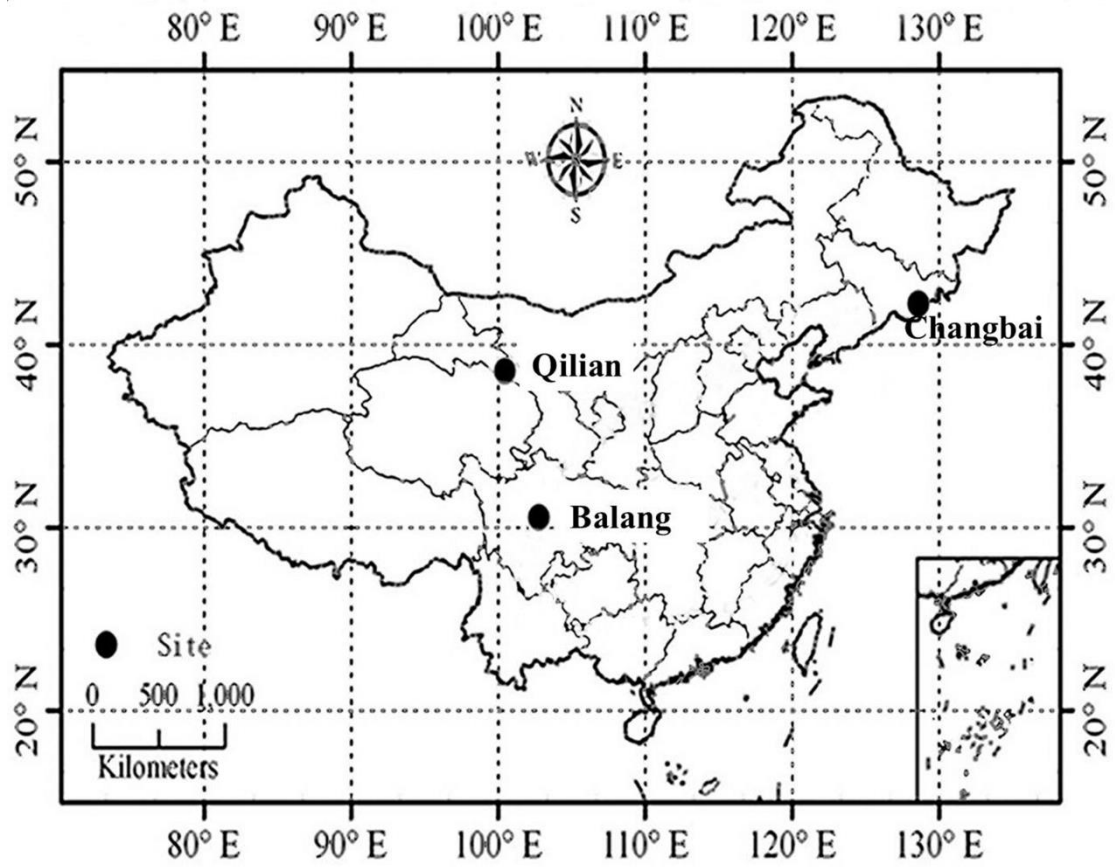

**Fig. S1** Location of three sampling sites of Balang (subtropical Mt.), Qilian (dry-temperate Mt.) and Changbai (wet-temperate Mt.).

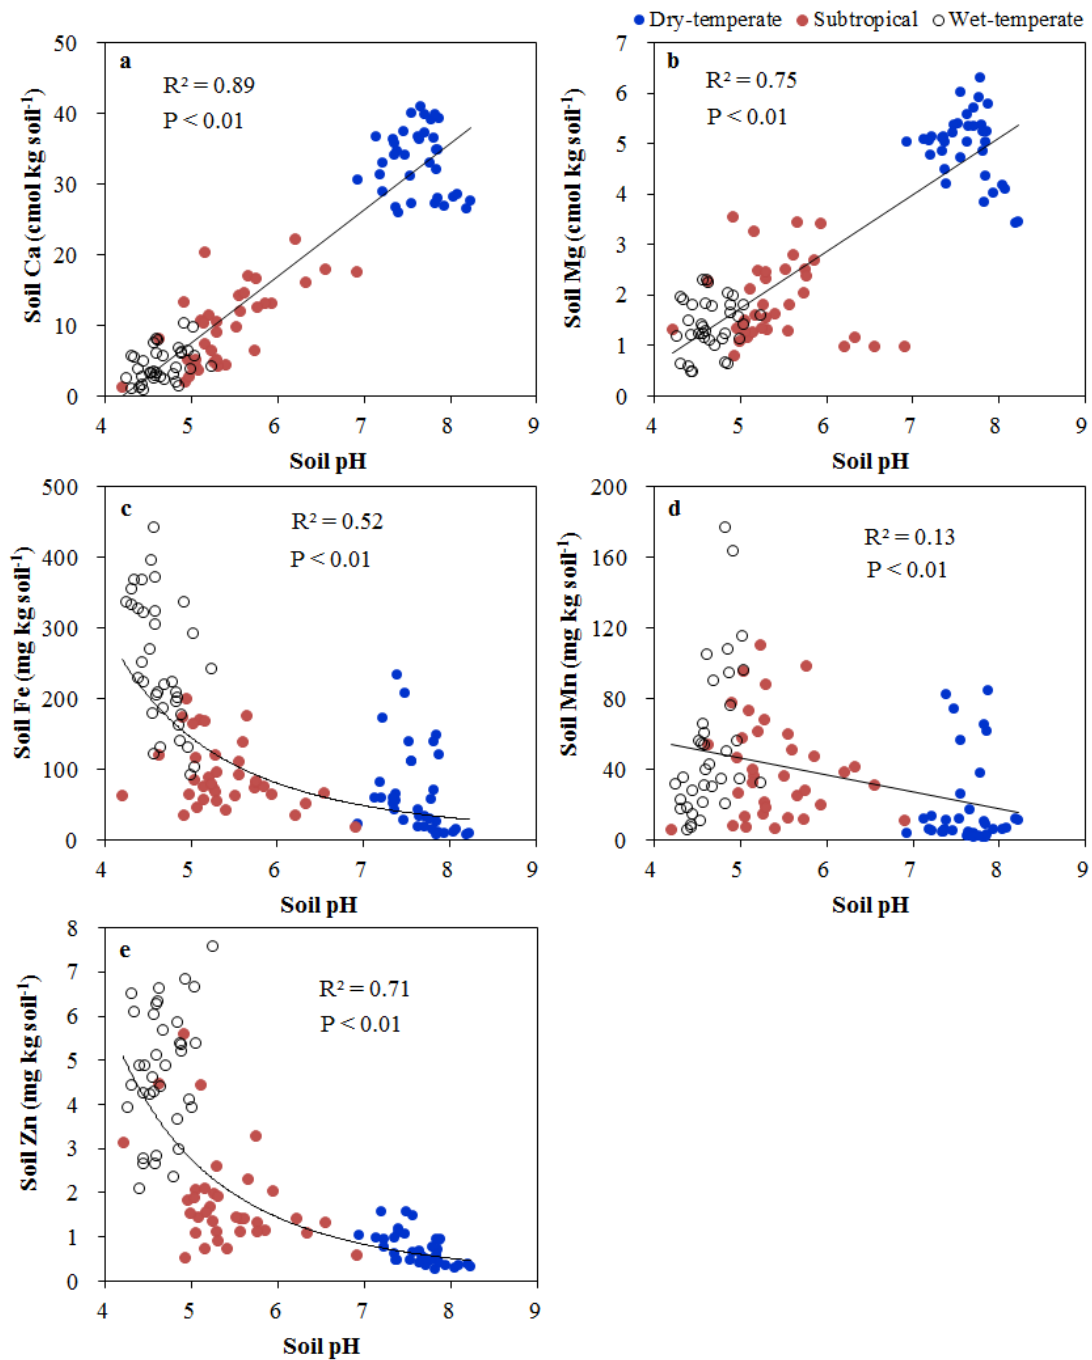

**Fig. S2** Correlation analyses between soil pH and soil exchangeable base cations of Ca (a) and Mg (b) and available micronutrients of Fe (c), Mn (d) and Zn (e) under trees and shrubs across three sampling sites.

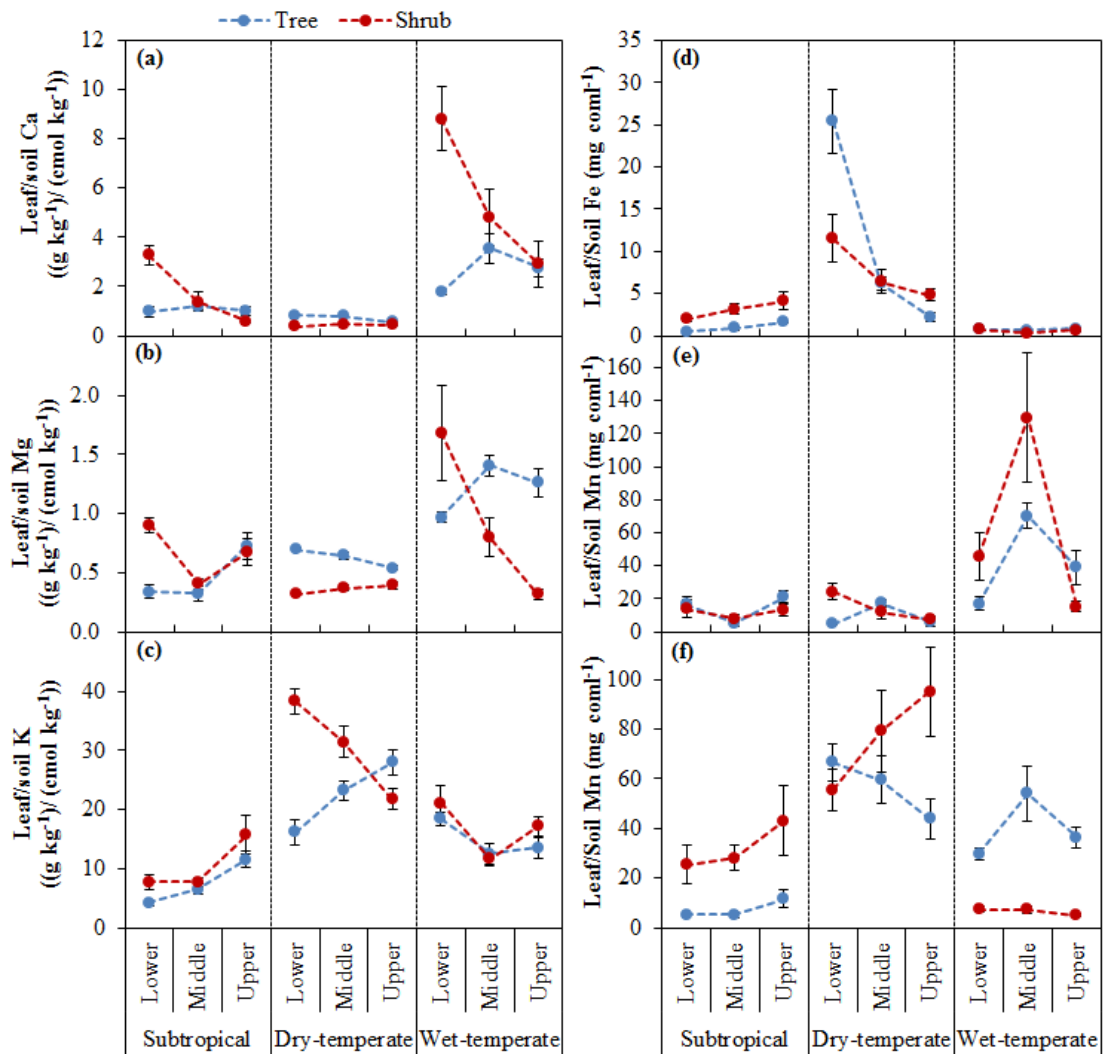

**Fig. S3** The ratio of nutrient concentrations of Ca (a), Mg (b), K (c), Fe (d), Mn (e) and Zn (f) in plant leaves to their availabilities in soils at lower and middle elevations as well as at the upper limit of trees or shrubs for each of the three sites.

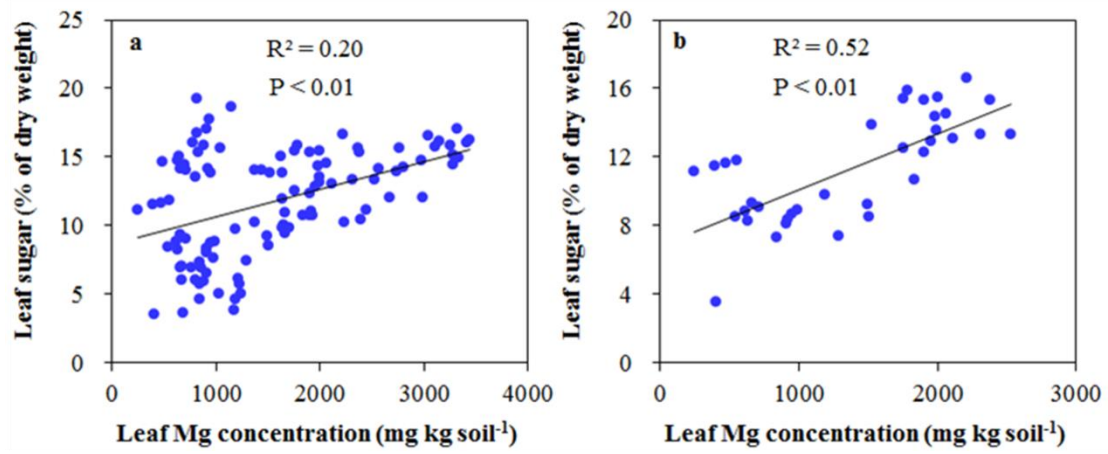

**Fig. S4** Correlation analyses between Mg concentration and soluble sugar contents across three sampling sites (a) and at wet-temperate Mt. (b).
