# Supplementary material for: Soil properties determine the elevational patterns of base cations andmicronutrients in plant-soil system up to the upper limits of trees and shrubs
Source: Copernicus journal article supplement (doi:10.5194/bg-2017-298), 2017-08-04
Supplement: Supplementary file [file bg-2017-298-AC2-supplement.pdf]

**Soil properties determine the elevational patterns of base cations and  
micronutrients in plant-soil system up to the upper limits of trees and shrubs**

Ruzhen Wang <sup>1,a</sup>, Xue Wang <sup>1,a</sup>, Yong Jiang <sup>1,\*</sup>, Artemi Cerdà <sup>2</sup>, Jinfei Yin <sup>1</sup>, Heyong  
5 Liu <sup>1</sup>, Xue Feng <sup>1</sup>, Zhan Shi <sup>1</sup>, Feike A. Dijkstra <sup>3</sup>, Mai-He Li <sup>1,4</sup>

<sup>1</sup> State Engineering Laboratory of Soil Nutrient Management, Institute of Applied  
Ecology, Chinese Academy of Sciences, Shenyang 110016, China

<sup>2</sup> Soil Erosion and Degradation Research Group, Department of Geography,  
University of Valencia, Valencia, Spain

10 <sup>3</sup> Sydney Institute of Agriculture, School of Life and Environmental Sciences, The  
University of Sydney, Sydney, NSW 2006, Australia

<sup>4</sup> Forest dynamics, Swiss Federal Research Institute WSL, Zuercherstrasse 111,  
CH-8903 Birmensdorf, Switzerland

<sup>a</sup> These authors contributed equally to this work.

15 \* Correspondence: [jiangyong@iae.ac.cn](mailto:jiangyong@iae.ac.cn); Tel.: +86 24 83970902 (Yong Jiang)

## Abstract

To understand whether base cations and micronutrients in the plant-soil system change with elevation, we investigated the patterns of base cations and micronutrients in both soils and plant tissues along three elevational gradients and three different climate zones in China. Base cations of Ca, Mg and K and micronutrients of Fe, Mn and Zn were determined in soils, trees and shrubs growing at lower and middle elevations as well as at their upper limits on Balang (subtropical, SW China), Qilian (dry-temperate, NW China) and Changbai (wet-temperate, NE China) mountains. No consistent elevational patterns were found for base cation and micronutrient concentrations in both soils and plant tissues (leaves, roots, shoots and stem sapwood).

Rather, soil pH, soil organic carbon (SOC), total soil nitrogen (TN), the SOC to TN ratio (C:N), and soil extractable nitrogen ( $\text{NO}_3^-$  and  $\text{NH}_4^+$ ) determined the elevational patterns of soil exchangeable Ca and Mg and available Fe, Mn and Zn. However, the controlling role of soil pH and SOC was not universal as revealed by their weak correlations with soil base cations under tree canopies at the wet-temperate mountain and with micronutrients under both tree and shrub canopies at the dry-temperate mountain. In most cases, soil base cation and micronutrient availabilities played fundamental roles in determining the base cation and micronutrient concentrations in plant tissues. An exceptional case existed for the decoupling of leaf K and Fe with their availabilities in the soil. Our results highlight the importance of soil physicochemical properties (mainly SOC, C:N and pH) rather than elevation (i.e., canopy cover and environmental factors, especially temperature), in determining base

cation and micronutrient availabilities in soils and subsequently their concentrations  
40 in plant tissues.

**Key words** base cation, micronutrient, plant tissue, soil physicochemical property,  
shrubline, treeline

## 1 Introduction

45 | Base cations and micronutrients are essential for soil fertility and plant  
physioecological processes of photosynthesis, metabolism, growth and productivity  
(Salisbury and Ross, 1992). For instance, exchangeable calcium (Ca) and magnesium  
(Mg) are predominant base cations responsible in buffering soil acidity, and  
deficiency of these nutrients can occur in terrestrial ecosystems (Naples and Fisk,  
50 | 2010; Baribault et al., 2012; Sardans and Peñuelas, 2015), particularly when they are  
exposed to acid rain. Micronutrient deficiency, on the other hand occurs more  
frequently, for instance when replenishment of micronutrients via litter decomposition  
do not keep pace with output processes of plant uptake and leaching (White and  
Zasoski, 1999; Hernandez-Apaolaza, 2014). High soil pH can limit the availability of  
55 | micronutrients of iron (Fe), manganese (Mn) and zinc (Zn) (Reisenauer, 1988; Lucena,  
2000; Rengel, 2007), while low soil pH can induce toxicities of trace metals  
constraining terrestrial net primary productivity (He et al., 2005; Reisenauer, 1988;  
Tian et al., 2016). The concentrations of soil base cations and available micronutrients  
were suggested to be positively and negatively correlated with soil pH, respectively,  
60 | but both positively correlated with soil organic matter (SOM) concentration  
(Reisenauer, 1988; Wang et al., 2017). Quantifying base cation and micronutrient  
concentrations in soils and plant tissues (leaves, roots, shoots, and stems) can help  
understand the nutritional status and potential deficiencies of micronutrients during  
plant growth (Richardson, 2004). However, little attention has been paid to base  
65 | cation and micronutrient availabilities as well as their inputs and outputs under

changing environmental conditions (Rengel, 2007).

The plant distribution along elevational gradients reflects changes in environmental conditions (Li et al., 2003, 2004, 2008a,b; Zhu et al., 2012a,b). Plants growing at high elevation, especially close to their upper limits, are expected to be highly sensitive to climate change, in particular to global warming (Noble, 1993). Physiological studies of treeline trees have mainly focused on macronutrients (*e.g.*, nitrogen (N), phosphorus (P), and Ca (Richardson, 2004; Liptzin et al., 2013; Mayor et al., 2017), while there are few data available for micronutrients in plant-soil systems along elevational gradients.

Two hypotheses have been proposed to explain nutrient accumulation and/or nutrient deficiency in plant tissues at high elevations (Oleksyn et al., 2002; Richardson, 2004). First, the decrease in temperature with increasing elevation declines soil microbial activity and plant metabolism, and thus constrains soil nutrient cycling and plant uptake processes (Körner & Paulsen, 2004; Thibault et al., 2014). At the alpine treeline, low temperature slows down microbial-mediated litter decomposition and thus reduces nutrient supply to plants (van den Driessche, 1974; Richardson, 2004). Second, another paradigm exists that plants retain higher nutrient concentrations in their tissues to maintain metabolic capacity and to avoid cold injury at higher elevations with cold growth conditions (Oleksyn et al., 2002). Whether plants growing at high elevations have higher or lower base cation and micronutrient concentrations is still unclear.

The change in environmental conditions along elevational gradients, including

temperature and growing season length (Barry, 1981), provides a unique opportunity to examine the spatial distribution of base cations and micronutrients in plant-soil systems. Uncertainties still exist whether soil properties, plant cover, or environmental factors determine the base cations and micronutrients in plant-soil systems. We, therefore, studied the base cation (Ca, Mg, and K) and micronutrient (Fe, Mn, and Zn) concentrations in plant-soil systems along elevational gradients up to the alpine treeline and shrubline in sub-tropic, dry temperate and wet temperate climate zones in China. Soil base cation and micronutrient concentrations can increase through soil weathering and decomposition of organic matter, but can decrease with plant uptake and loss through leaching. At low elevations, forests have closed canopies and become increasingly more open with elevation. We therefore hypothesized that soil base cation and micronutrient concentrations increase with increasing elevation because plant uptake decreases more than the supply through weathering and decomposition with elevation. We also expected that plants at higher elevations would have greater base cation and micronutrient concentrations in their tissues (leaves, roots, shoots, and stem sapwood) to maintain physio-ecological processes in a colder environment. To test these hypotheses, we collected soil and plant samples along three elevational gradients from lower elevations up to the alpine treeline or shrubline in three different climate zones in China, and studied the Ca, Mg, K, Fe, Mn, and Zn concentrations in plant-soil systems.

## **2 Materials and methods**

## 110 2.1 Site description and sample collection

Study sites were located in three climate zones (summarized in Table S1): Balang mountain with a subtropical climate located in Wolong Nature Reserve ("subtropical Mt.", 102°52'-103°24'E, 30°45'-31°25'N) in southwestern China, Qilian mountain located in the dry-temperate climate zone ("dry-temperate Mt.", 102°58'-103°01'E, 115 37°14'-37°20'N) in northwestern China, and Changbai mountain with a wet-temperate climate ("wet-temperate Mt.", 126°55'-129°00'E, 41°23'-42°36'N) located in northeastern China (see Fig. S1). The subtropical Mt. is influenced by warm-wet monsoon masses in summer and continental air masses in winter (Li et al., 2012). The mean annual precipitation (MAP) of the subtropical Mt. is about 846 mm monitored 120 by Dengsheng Meteorological Station at 2730 m (Li et al., 2012). For the dry-temperate Mt., the MAP is 435 mm, which is monitored by the Qilian weather station at 2787 m altitude (Qiang et al., 2003). The wet-temperate Mt. is located in a typical continental temperate monsoon climate zone with MAP increasing from 632 to 1154 mm along the elevational gradient from 530 to 2200 m (Shen et al., 2013).

125 In this study, the alpine treeline and shrubline are defined as the upper limit of obvious trees and shrubs, respectively. The trees that were investigated are *Abies faxoniana* (elevation range 2860-3670 m) for subtropical Mt., *Picea crassifolia* (elevation range 2540-3250 m) for dry-temperate Mt., and *Betula ermanii* (elevation range 1700-2030 m) for wet-temperate Mt.. The shrubs are *Quercus aquifolioides* 130 (elevation range 2840-3590 m), *Salix gilashanica* (elevation range 3020-3540 m), and *Vaccinium uliginosum* (elevation range 1430-2380 m) for the subtropical,

dry-temperate and wet-temperate Mts., respectively. The targeted treeline trees and shrubline shrubs are dominant and common species, respectively, for each study site.

135 The soils from the three sampling sites of subtropical, dry-temperate, and wet-temperate were classified as Umbric Cryic Cambisols, Calcaric Ustic Cambisols and Andic Gelic Cambisols, respectively (IUSS Working Group WRB, 2014).

Plant tissue samples of current-year mature leaves, roots (< 2 mm), stem sapwood, and shoots (twigs) from trees and shrubs were collected at lower and middle elevations, as well as at the upper limits. At each elevation, 6 plots (10 m × 10 m) were selected to serve as 6 replicates on southern slopes. Within each plot, 6-10 trees or shrubs of similar height were randomly selected for tissue sampling. Soils (0-10 cm) were directly collected under the canopy of trees or shrubs sampled for each plot using a 3-cm diameter corer. Both plant and soil samples were homogenized and composited within each plot. Samples were collected at the middle of July for subtropical Mt., at the beginning of August for dry-temperate Mt., and at end of August for wet-temperate Mt. in 2014. The main characteristics of the three study sites are summarized in Table S1.

140  
145

## **2.2 Chemical analysis**

The soil samples were separated into two parts with one part being air-dried to constant weight and the other stored at 4 °C for further analyses. For subtropical and wet-temperate Mts., soil organic carbon (SOC) and total nitrogen (TN) was determined on ground soils using an elemental analyzer (Vario MACRO Cube, Elementar, Germany). For dry-temperate Mt., the ground soil samples were treated

150



with 12 M HCl according to Wang et al. (2015) to remove inorganic C before organic  
155 C determination on the elemental analyzer. Soil  $\text{NO}_3^-$ -N and  $\text{NH}_4^+$ -N were extracted  
from fresh soils with a 2 M KCl solution and measured using an AutoAnalyser III  
continuous Flow Analyzer (Bran & Luebbe, Norderstedt, Germany). Soil total  
inorganic nitrogen (TIN) was the sum up of extractable  $\text{NO}_3^-$ -N and  $\text{NH}_4^+$ -N. Soil  
Olsen phosphorus (P) was quantified by colorimetric analysis after extraction with a  
160 0.5 M  $\text{NaHCO}_3$  solution (Olsen et al., 1954).

A subsample of 5 g soil was used to determine soil pH in a 1:5 (w/v) soil-to-water  
extract. Soil exchangeable base cations were extracted with a 1 M ammonium acetate  
solution (Wang et al., 2017). Soil available micronutrients were extracted by  
diethylenetriamine pentaacetic acid (DTPA) according to Lü et al. (2016). Briefly, 10  
165 g of soil was extracted by 20 ml 0.005 M DTPA + 0.01 M  $\text{CaCl}_2$  + 0.1 M TEA  
(triethanolamine) (pH 7.0). The soil-solution suspension was shaken for 2 h at 180  
rpm and then filtered through ash-free filter paper. The concentrations of base cations  
and micronutrients were determined using an atomic absorption spectrometer (AAS,  
Shimadzu, Japan).

170 Plant samples of leaves, roots, shoots and stem sapwood were oven-dried and  
ground for base cation and micronutrient analyses. Root samples were washed prior to  
being oven-dried. To determine total base cation and trace element concentrations, 0.2  
g plant samples were digested with a mixture of acids of  $\text{HNO}_3$  and  $\text{HClO}_4$  (5:1, v/v)  
on a hot plate. After the mixture turned into clear solution, the digests were decanted  
175 into a 50 ml volumetric flasks and the volume was adjusted into 50 ml. The

concentrations of Ca, Mg, K, Fe, Mn, and Zn were determined by the AAS (Shimadzu, Japan).

### 2.3 Statistical analyses

Normality of data was determined using the Kolmogorov-Smirnov test, and  
180 homogeneity of variances using Levene's test. Two-way ANOVAs were executed to  
determine the effects of plant life form (tree or shrub), elevation position and their  
interactions on soil pH, SOC, soil exchangeable base cations and available  
micronutrients, and total base cations and micronutrients in plant tissues. We assigned  
sampling site as a random factor in the statistics, as this study aimed to test the general  
185 elevational patterns instead of site-specific heterogeneity of base cations and  
micronutrients in plant-soil system across three sites. Within each site, the effect of  
elevation on measured parameters was determined by multiple comparisons with a  
Tukey design for soils and each life form. Pearson correlation analysis was used to  
determine the relationships between measured parameters. All statistical analyses  
190 were performed in SPSS 16.0 (SPSS, Inc., Chicago, IL, USA) and statistical  
significance was accepted at  $P < 0.05$ .

## 3 Results

### 3.1 Soil pH and SOC

195 Soil pH was significantly different among elevational positions (Table 1). For both  
subtropical and dry-temperate Mts., soil pH decreased with increasing elevation under  
tree canopy, while it was the opposite trend under shrub canopy (Fig. 1a). For

wet-temperate Mt., the upper limit of shrubs had significantly higher soil pH (Fig. 1a).

For all three sites, SOC concentration showed a hump-shaped trend with the highest value at the middle elevation under tree canopy (Fig. 1b). Under shrubs, SOC concentration significantly increased with increasing elevation for subtropical and wet-temperate Mts., while it was the lowest at the upper limit of shrubs for dry-temperate Mt. (Fig. 1b).

### 3.2 Changes in soil base cations and available micronutrients

Soil exchangeable Ca and Mg decreased with increasing elevation under tree canopy of subtropical and wet-temperate Mts. and under shrubs of dry-temperate Mt. (not for Mg) (Fig. 2a,b). However, they showed the opposite trend under shrubs of subtropical (not for Mg) and wet-temperate Mts. and under trees of dry-temperate Mt. (Fig. 2a,b).

Soil exchangeable K decreased with increasing elevation under tree and shrub canopies at subtropical Mt. and under trees at dry-temperate Mt. (Fig. 2c).

Soil available Fe was significantly affected by elevation position (Table 1, Fig. 2d). The upper limit had the lowest concentration under both tree and shrub canopies for subtropical Mt. and under shrub canopy for wet-temperate Mt. (Fig. 2d). For dry-temperate Mt., soil available Fe significantly increased with increasing elevation under both tree and shrub canopies (Fig. 2a). For subtropical Mt., soil available Mn was significantly higher at the middle elevation under tree canopies. Soil available Mn decreased with increasing elevation under shrub and tree canopies for subtropical and wet-temperate Mts., respectively, while it showed the opposite trend under both tree

220 and shrub canopies of [dry-temperate Mt.](#) and under shrubs of [wet-temperate Mt.](#) (Fig. 2e). Soil available Zn was significantly affected by plant life form and the interactive effect between life form and elevation position (Table 1). Specifically, soils at the upper limit had the highest available Zn under shrubs at [wet-temperate Mt.](#).

### 225 **3.3 Base cations in plants**

For [subtropical Mt.](#), a significant decrease of Ca concentration was detected in the leaves of trees and shrubs (Fig. 3a), roots and shoots of trees (Fig. 3b,c), and stem sapwood of shrubs (Fig. 3d). For [dry-temperate Mt.](#), Ca concentration decreased with increasing elevation in roots, shoots and stem sapwood of trees (Fig. 3b,c,d), and in 230 shoots and stem sapwood of shrubs (Fig. 3c,d). For [wet-temperate Mt.](#), shoot Ca concentration decreased with increasing elevation for trees (Fig. 3c). Along with increasing elevation, a significant decrease of Mg was found in shrub leaves, tree roots, shrub shoots and stem sapwood at [sub-tropical Mt.](#) (Fig. 3e,f,g,h), and in roots, shoots and stem sapwood of trees at [dry-temperate Mt.](#) (Fig. 3f,g,h), and in leaves and 235 shoots of both trees and shrubs at [wet-temperate Mt.](#) (Fig. 3e,g). With the increase in elevation, K concentration significantly decreased in leaves of trees, roots and stem sapwood of both trees and shrubs at [subtropical Mt.](#) (Fig. 3i,j,l), in tree shoots of [dry-temperate Mt.](#) (Fig. 3k), and in leaves of both trees and shrubs at [wet-temperate Mt.](#) (Fig. 3i).

240

### **3.4 Micronutrients in plants**

For [subtropical Mt.](#), Fe concentrations in leaves (Fig. 4a) and roots (Fig. 4b) showed a similar trend with soil available Fe, with the highest values at the middle elevation for both trees and shrubs. For [dry-temperate Mt.](#), the highest Fe concentrations were found at the lower elevation in leaves (Fig. 4a), roots (Fig. 4b), shoots (Fig. 4c) and stem sapwood (Fig. 4d) for trees and in shoots (Fig. 4c) and stem sapwood (Fig. 4d) for shrubs. For [wet-temperate Mt.](#), Fe concentration was the highest in tree shoots at the middle elevation (Fig. 4c), in shrub leaves at lower elevation (Fig. 4a), and in roots, shoots and stem sapwood of shrubs at the upper limit of trees (Fig. 4b,c,d).

The Mn concentration decreased with increasing elevation in leaves and shoots of both trees and shrubs at [subtropical Mt.](#) (Fig. 4e,g), in stem sapwood of shrubs at both [subtropical](#) and [dry-temperate Mts.](#) (Fig. 4h). The Mn concentration increased with increasing elevation in leaves of trees at [dry-temperate Mt.](#) (Fig. 4e), in roots of both trees and shrubs at [wet-temperate Mt.](#) (Fig. 4f), in shoots of shrubs and stem sapwood of trees and shrubs at [wet-temperate Mt.](#) (Fig. 4g,h).

The Zn concentration was the highest at middle elevation for trees in leaves at [wet-temperate Mt.](#) (Fig. 4i), in roots at [dry-temperate Mt.](#) (Fig. 4j), in shoots at [wet-temperate Mt.](#) (Fig. 4k) and in stem sapwood at [subtropical Mt.](#) (Fig. 4l). With the increase in elevation, a decrease of Zn concentration was found in roots of trees at [subtropical Mt.](#) (Fig. 4j) and in stem sapwood of shrubs at [dry-temperate Mt.](#) (Fig. 4l); however, an increase of Zn was found in shrub roots at [wet-temperate Mt.](#), in shoots of trees at [dry-temperate Mt.](#) and shrubs at [wet-temperate Mt.](#) (Fig. 4k), and in stem sapwood of trees at [dry-temperate Mt.](#) and shrubs at [wet-temperate Mt.](#) (Fig. 4l).

### 265 3.5 Correlations

Across all sampling sites and plant life forms, both soil exchangeable Ca and Mg were positively correlated with soil pH (Fig. S2a,b) and TN (Table 2), while they were negatively correlated with soil C:N, NO<sub>3</sub><sup>-</sup>, and NH<sub>4</sub><sup>+</sup> (Table 2). For wet-temperate Mt., both soil pH and SOC showed no relationship with soil exchangeable Ca and Mg under tree canopies, although SOC was positively related to exchangeable K (Table S2). Negative correlations were found between stem and leaf for both Mg and K concentrations ( $p < 0.01$ ; Table S3). However, Mg and K concentrations in roots showed no correlation with that in leaves (Table S3).

When analyzing data across sampling sites and plant life forms, soil available Fe, Mn and Zn negatively correlated with soil pH ( $p < 0.01$ ; Table 2, Fig. S2c,d,e), and soil available Fe and Zn positively correlated with SOC ( $p < 0.01$ ; Table 2). However, available micronutrients had no relationships with both soil pH and SOC at dry-temperate Mt., except for a positive correlation between soil pH and available Mn under shrub canopies (Table S2). For both Mn and Zn concentrations, significant and positive correlations were found between soil and plant tissues (Table S3). However, soil available Fe negatively correlated with Fe concentrations in shoot and stem ( $p < 0.01$ ; Table S3).

## 4 Discussion

### 285 4.1 Elevational patterns of base cations and available micronutrients in soils and

## relationships with pH and SOC

Contrary to our first hypothesis, no consistent elevational patterns were detected for soil exchangeable base cations and available micronutrients under either trees or shrubs. Inconsistent elevational patterns of soil base cations and available  
290 micronutrients indicated that plant uptake of these nutrients did not necessarily decrease more than nutrient supply at higher elevation due to more open canopies. Our results suggest that soil physiochemical parameters were the dominant contributors and more important than environmental gradients affecting elevational patterns of soil exchangeable base cations and available micronutrients (Fig. S2, Table  
295 2). For instance, soil available Fe, Mn and Zn followed patterns of SOC under trees along the elevational gradient at subtropical Mt. (Table S2), while for shrubs at subtropical Mt., soil pH, instead of SOC, regulated elevational patterns of soil available Fe, Mn and Zn (Table S2). Our findings are consistent with a vast amount of previous studies confirming the pivotal role of soil pH and SOC concentration in  
300 determining soil base cation and micronutrient availabilities (Sharma et al., 2004; Lü et al., 2016; Wang et al., 2017). However, the fundamental roles of SOC and soil pH in controlling soil base cation and micronutrient availabilities, was not universal as suggested by the relatively weak relationships of soil pH and SOC with soil base cations under tree canopies at wet-temperate Mt. and with micronutrients under both  
305 tree and shrub canopies at dry-temperate Mt. (Table S2). This could indicate species-specific responses and effects on soil base cation and micronutrient availabilities.

Other soil parameters, such as C:N and extractable  $\text{NO}_3^-$  and  $\text{NH}_4^+$  also influenced the availability of base cations (Table 2). Soil C:N ratio serves as an indicator of SOM decomposition status where more decomposed SOM possesses a lower C:N ratio (Sollins et al., 2009) and a higher content of negatively charged functional groups (i.e. phenolic, carboxyl, and hydroxyl groups) (Haberhauer et al., 1998). In this study, negative correlations between soil C:N and base cations (Table 2) suggest that more decomposed SOM is beneficial for the retention of soil base cations. Furthermore, soil with a higher level of extractable  $\text{NO}_3^-$  predisposes cations to leach accompanied by loss of  $\text{NO}_3^-$  (Cremer and Prietzel, 2017). Therefore, significant negative correlations were detected between soil  $\text{NO}_3^-$  and base cations in this study (Table 2). Soil extractable  $\text{NH}_4^+$  was also negatively correlated to exchange with Ca and Mg, possibly because  $\text{NH}_4^+$  can exchange with base cations on surface soil colloids into soil solution thereby enhancing their loss (Wang et al., 2015; Cusack et al., 2016).

A negative correlation between soil pH and soil available micronutrients (Table 2) might be due to precipitation of micronutrient cations at higher soil pH (Rengel, 2007). Indeed, solubility of micronutrients was suggested to decrease from 100-fold (for Mn and Zn) to 1000-fold (for Fe) with one-unit increase of soil pH (Rengel, 2001). Soil organic matter plays an important role in micronutrient retention due to its negative charge (He et al., 2005; Wang et al., 2015, 2017). This may be a reason for the positive relationships between SOC and micronutrients (although not always significant, Table 2). While no general patterns were found for distribution of



330 micronutrients under both tree and shrub canopies with elevation, our results suggest  
that the determinants of soil micronutrient availabilities were soil pH and SOC  
concentration, which are reflections of long-term climatic conditions, plant-soil  
interactions, and biogeochemical processes (Sinsabaugh et al., 2008).

#### 335 **4.2 Elevational patterns of base cations and micronutrients in plants and plant-soil system**

In contrast to our second hypothesis, both trees and shrubs at higher elevation did not  
necessarily contain higher base cation and micronutrient concentrations in their  
tissues. No general patterns were found for base cations and micronutrients in both  
340 trees and shrubs along elevational gradients across the three sites (Fig. 3,4). Even  
normalizing the data to per unit concentration of soil available nutrients, there were  
still no consistent elevational patterns for both base cations and micronutrients in  
plant tissues (Fig. S3). This suggests that base cation and micronutrient concentrations  
in plants are influenced by other factors besides elevation-induced changes in  
345 temperature, precipitation, specific nutrient absorption characteristics of different  
tissues, soil base cation and micronutrient availabilities and other edaphic properties  
(Campo-Alves, 2003; Richardson, 2004). Another explanation could be that initial  
differences in soil properties (e.g., parent material) among elevation positions were  
larger than the effects of elevation. Soil base cation and micronutrient availabilities  
350 were an important factor influencing their concentrations in plant tissues across all  
plant species and sampling sites (Table S3). Similar results were found for

macronutrients (i.e. nitrogen and phosphorus) suggesting that “plants are what they root in” (Elser et al., 2010; Han et al., 2014). However, plant nutrients did not covary with soil nutrients along a 2200 km-long climatic gradient in grasslands of northern  
355 China (Luo et al., 2015, 2016). The discrepancy of our study with Luo et al. (2015, 2016) might be driven by different ecosystem types (forest vs. grassland), dominant climatic factor gradients (temperature vs. precipitation), and different soil properties. The studies of Luo et al. (2015, 2016) were conducted in grassland ecosystems where precipitation played an essential role in nutrient concentrations in plant-soil systems.  
360 Moreover, base cation and micronutrient cycling processes are likely to be different between high-organic and fine-grained forest soils in our study versus low-organic and sandy grassland soils in Luo et al. (2016). Inconsistent elevational patterns in plant nutrient concentrations could also be derived from the fact that individual plant species reinforced patterns of soil nutrient availabilities in their vicinity causing a  
365 positive feedback between plant and soil (Hobbie, 1992).

The topic of base cation and micronutrient translocation in intact plant is important as it deals with the movement of micronutrients from root to the leaves for physiological activities, such as photosynthesis (Welch and Shuman, 1995). Also, it is an important process in determining plant chemical composition and subsequently  
370 litter quality, litter decomposition and nutrient release (Sun et al., 2016). Given earlier findings that transport of base cations from roots to the leaves in woody plants is slow (van der Heijden et al., 2015), we found no significant correlation for both Mg and K  
between roots and leaves (Table [S3](#)). However, negative relationships of stem Mg vs.

leaf Mg and stem K vs. leaf K suggest that the plant internal pools of base cations  
375 could act as sources of base cation supply for leaves (Weatherall et al., 2006).  
Translocation of base cations within plant tissues is one of [the](#) main physiological  
mechanisms buffering low nutrient availabilities in soils (van der Heijden et al., 2015).  
For instance, supplementation of Mg is a critical process to maintain photosynthesis in  
forests growing on acid and cation poor soils (Verbruggen and Hermans, 2013). In  
380 support of this, we found significantly positive correlations between Mg and soluble  
sugar concentrations (one of the main photosynthate) in leaves across the three sites  
(Fig. S4a), while relationships were more pronounced at [wet-temperate Mt.](#) (Fig.S4b)  
where soil pH and exchangeable Mg was the lowest (Fig. 1a, 2b).

Unlike Ca, Mg, Mn and Zn, the concentrations of K and Fe in plant leaves  
385 decoupled with their availabilities in the soil (Table [S3](#)), which may suggest that not  
only availability of these nutrients in soils affect their leaf concentrations, but that also  
other environmental factors (*e.g.*, temperature) played more important roles in  
affecting plant nutrition (van den Driessche, 1974). We do not know why this  
decoupling only occurred for K and Fe, but possibly factors such as temperature  
390 constrained soil microbial activity and plant metabolism (Körner and Paulsen, 2004)  
and subsequently uptake of these nutrients by plants. On the other hand, plants often  
increase nutrient uptake to compensate for decreased metabolism at low temperature  
(Reich and Oleksyn, 2004). Thus, these opposite effects of temperature on K and Fe  
concentrations in plant tissues may have obscured their relationships with K and Fe  
395 availability in the soil along the elevational gradients. While plant nutrient

concentrations were mainly influenced by nutrient availabilities in the soil and by plant-internal translocation processes, we found no consistent evidence that plants accumulate more base cations and micronutrients in their tissues to better adapt to cold environments at higher elevation.

400

## **5 Conclusions**

We did not find consistent elevational patterns of base cations and micronutrients in plant-soil systems along three different elevation transects up to the alpine treeline and shrubline in different regions of China. Rather, our results highlight the essential  
405 roles of specific edaphic properties of soil pH, SOC and extractable nitrate and ammonium in regulating soil base cation and micronutrient availabilities among sampling sites. Soil available base cations and micronutrients were mostly positively correlated to concentrations of base cations and micronutrients in plant tissues, except for K and Fe. Our results suggest that base cation and micronutrient concentrations in  
410 plants located in upper limits of the tree- and shrublines are largely controlled by their availabilities in the soil, rather than by plant adaptations to avoid cold injury at higher elevations.

## **Acknowledgments**

415 This was financially supported by the National Natural Science Foundation of China (41371076, 31570501) and the Strategic Priority Research Program of the Chinese Academy of Sciences (XDB15010302).

## Data Availability

420 Data sets for this paper can be obtained via personal communication.

## Author contributions

Mai-He Li designed the study; Xue Wang, Heyong Liu, Jinfei Yin and Zhan Shi did the plant and soil measurements; Ruzhen Wang and Xue Wang analyzed the data;

425 Ruzhen Wang wrote the manuscript; Mai-He Li, Feike A. Dijkstra and Artemi Cerdà revised the manuscript; Mai-He Li and Yong Jiang provided funding and laboratory facilities for this study.

## References

430 Barry, R. G.: Mountain weather and climate. Methuen, London and New York, 1981.

[Baribault, T. W., Kobe, R. K., Finley, A. O.: Tropical tree growth is correlated with soil phosphorus, potassium, and calcium, though not for legumes. Ecol. Monogr., 82, 189-203, doi:10.1890/11-1013.1, 2012.](#)

435 [Campo-Alves J.: Nutrient availability and fluxes along a toposequence with tropical dry forest in Mexico. Agrociencia, 37, 211-219, 2003.](#)

Cremer, M., and Prietzel, J.: Soil acidity and exchangeable base cation stocks under pure and mixed stands of European beech, Douglas fir and Norway spruce. Plant Soil, 415, 393-405, doi:10.1007/s11104-017-3177-1, 2017.

Cusack, D. F., Macy, J., and McDowell, W. H.: Nitrogen additions mobilize soil base

- 440 cations in two tropical forests. *Biogeochemistry*, 128, 67-88,  
doi:10.1007/s10533-016-0195-7, 2016.
- Elser, J. J., Fagan, W. F., Kerkhoff, A. J., Swenson, N. G., and Enquist, B. J.:  
Biological stoichiometry of plant production: metabolism, scaling and ecological  
response to global change. *New Phytol.*, 186, 593-608,  
445 doi:10.1111/j.1469-8137.2010.03214.x, 2010.
- Han, X., Sistla, S.A., Zhang, Y., Lü, X., and Han, X.: Hierarchical responses of plant  
stoichiometry to nitrogen deposition and mowing in a temperate steppe. *Plant Soil*,  
382, 175-187, doi:10.1007/s11104-014-2154-1, 2014.
- He, Z., Yang, X., and Stoffella, P. J.: Trace elements in agroecosystems and impacts  
450 on the environment. *J. Trace Elem. Med. Biol.*, 19, 125-140,  
doi:10.1016/j.jtemb.2005.02.010, 2005.
- Hernandez-Apaolaza, L.: Can silicon partially alleviate micronutrient deficiency in  
plants? A review. *Planta*, 240, 447-458, doi:10.1007/s00425-014-2119-x, 2014.
- IUSS Working Group WRB: World Reference Base for Soil Resource 2014.  
455 International soil classification system for naming soils and creating legends for  
soil maps. World Soil Resources Reports No. 106, FAO, Rome, 2014.
- Kochian, L. V.: Mechanisms of micronutrient uptake, translocation, and interactions  
in plants. In: Mortvedt JJ, Cox FR, Shuman LM, Welch RM (eds) *Micronutrients in  
Agriculture*. Soil Science Society of America, Madison pp 229-296, 1991.
- 460 Körner, C., and Paulsen, J.: A world-wide study of high altitude treeline temperatures.  
*J. Biogeogr.*, 31, 713-732, doi:10.1111/j.1365-2699.2003.01043.x, 2004.

- Laudicina, V. A., Novara, A., Barbera, V., Egli, M., and Badalucco, L.: Long-term tillage and cropping system effects on chemical and biochemical characteristics of soil organic matter in a Mediterranean semiarid environment. *Land Degrad. Dev.*, 465 26, 45-53, doi:10.1002/ldr.2293, 2015.
- Li, M.-H., Yang, J., and Kr äuchi, N.: Growth responses of *Picea abies* and *Larix decidua* to elevation in subalpine areas of Tyrol, Austria. *Can. J. For. Res.*, 33, 653-662, doi:https://doi.org/10.1139/x02-202, 2003.
- Li, M.-H., and Yang, J.: Effects of elevation and microsite on growth of *Pinus cembra* 470 in the subalpine zone of the Austrian Alps. *Ann. For. Sci.*, 61, 319-325, doi:10.1051/forest:2004025, 2004.
- Li, M.-H., Xiao, W., Shi, P., Wang, S., Zhong, Y., Liu, X., Wang, X., Cai, X., and Shi, Z.: Nitrogen and carbon source-sink relationships in trees at the Himalayan treelines compared with lower elevations. *Plant Cell Environ.*, 31, 1377-1387, 475 doi:10.1111/j.1365-3040.2008.01848.x, 2008.
- Li, M.-H., Xiao, W., Wang, S., Cheng, G., Cherubini, P., Cai, X., Liu, X., Wang, X., and Zhu, W.: Mobile carbohydrates in Himalayan treeline trees I. Evidence for carbon gain limitation but not for growth limitation. *Tree Physiol.*, 28, 1287-1296, doi:https://doi.org/10.1093/treephys/28.8.1287, 2008.
- 480 Li, Z., Liu, G., Fu, B., Hu, C., Luo, S., Liu, X., and He, F.: Anomalous temperature-growth response of *Abies faxoniana* to sustained freezing stress along elevational gradients in China's Western Sichuan Province. *Trees*, 26, 1373-1388, doi:10.1007/s00468-012-0712-9, 2012.

- Liptzin, D., Sanford, Jr. R. L., and Seastedt, T. R.: Spatial patterns of total and  
485 available N and P at alpine treeline. *Plant Soil*, 365, 127-140,  
doi:10.1007/s11104-012-1379-0, 2013.
- Lucena, J.J.: Effects of bicarbonate, nitrate and other environmental factors on iron  
deficiency chlorosis: A review. *J. Plant Nutri.*, 23, 1591-1606,  
doi:10.1080/01904160009382126, 2000.
- 490 Luo, W., Elser, J. J., Lü, X., Wang, Z., Bai, E., Yan, C., Wang, C., Li, M.-H.,  
Zimmermann, N. E., Han, X., Xu, Z., Li, H., Wu, Y., and Jiang, Y.: Plant nutrients  
do not covary with soil nutrients under changing climatic conditions. *Global  
Biogeochem. Cy.*, 29, 1298-1308, doi:10.1002/2015GB005089, 2015.
- Luo, W., Sardans, J., Dijkstra, F. A., Peñuelas, J., Lü, X., Wu, H., Li, M.-H., Bai, E.,  
495 Wang, Z., Han, X., and Jiang, Y.: Thresholds in decoupled soil-plant elements under  
changing climatic conditions. *Plant Soil*, 409, 159-173,  
doi:10.1007/s11104-016-2955-5, 2016.
- Lü, L., Wang, R., Liu, H., Yin, J., Xiao, J., Wang, Z., Zhao, Y., Yu, G., Han, X., and  
Jiang, Y.: Effect of soil coarseness on soil base cations and available micronutrients  
500 in a semi-arid sandy grassland. *Solid Earth*, 7, 549-556, doi:10.5194/se-7-549-2016,  
2016.
- Martens, D. C., and Westermann, D. T.: Fertilizer applications for correcting  
micronutrient deficiency. In: Mortvedt JJ, Cox FR, Shuman LM, Welch RM (eds)  
Micronutrients in agriculture. Soil Science Society of America, Madison, pp  
505 549-592, 1991.



- Mayor, J. R., Sanders, N. J., Classen, A. T., Bardgett, R. D., Clément, J. C., Fajardo, A., Lavorel, S., Sundqvist, M. K., Bahn, M., Chisholm, C., Cieraad, E., Gedalof, Z., Grigulis, K., Kudo, G., Oberski, D. L., and Wardle, D. A.: Elevation alters ecosystem properties across temperate treelines globally. *Nature*, 542, 91-95, 510 doi:10.1038/nature21027, 2017.
- McLaughlin, M. J., Parker, D. R., and Clarke, J. M.: Metals and micronutrients-food safety issues. *Field Crop Res.*, 60, 143-163, doi:https://doi.org/10.1016/S0378-4290(98)00137-3, 1999.
- 515 [Naples, B. K., Fisk, M. C.: Belowground insights into nutrient limitation in northern hardwood forests. \*Biogeochemistry\*, 97, 109-121, doi:10.1007/s10533-009-9354-4, 2010.](#)
- Noble, I. R.: A model of the responses of ecotones to climate change. *Ecol. Appl.*, 3, 396-403, doi:10.2307/1941908, 1993.
- 520 Oleksyn, J., Reich, P. B., Zytowski, R., Karolewski, P., and Tjoelker, M. G.: Needle nutrients in geographically diverse *Pinus sylvestris* L. populations. *Ann. For. Science*, 59, 1-18, doi: https://doi.org/10.1051/forest:2001001, 2002.
- Olsen, S. R., Watanabe, F. S., Cosper, H. R., Larson, W. E., and Nelson, L. B.: Residual phosphorus availability in long-term rotations on calcareous soils. *Soil Sci.*, 78, 141-152, 1954.
- 525 Qiang, W., Wang, X., Chen, T., Feng, H., An, L., He, Y., and Wang, G.: Variations of stomatal density and carbon isotope values of *Picea crassifolia* at different altitudes in the Qilian Mountains. *Trees*, 17, 258-262, doi:10.1007/s00468-002-0235-x,

2003.

Reisenauer, H. M.: Determination of plant-available soil manganese. In: Graham RD,  
530 Hannam RJ, Uren NC (eds) Manganese in soils and plants. Kluwer Academic  
Publisher, Dordrecht, pp 87-98, 1988.

Reich, P. B., and Oleksyn, J.: Global patterns of plant leaf N and P in relation to  
temperature and latitude. P. Natl. Acad. Sci. USA, 101, 11001-11006,  
doi:10.1073/pnas.0403588101, 2004.

535 Rengel, Z.: Genotypic differences in micronutrient use efficiency in crops. Commun.  
Soil Sci. Plant Anal., 32, 1163-1186, doi:http://dx.doi.org/10.1081/CSS-100104107,  
2001.

Rengel, Z.: Cycling of micronutrients in terrestrial ecosystem. In: Marschner P,  
Rengel Z (eds) Nutrient cycling in terrestrial ecosystems. Springer-Verlag, Berlin,  
540 pp 93-113, 2007.

Richardson, A. D.: Foliar chemistry of balsam fir and red spruce in relation to  
elevation and the canopy light gradient in the mountains of the northeastern United  
States. Plant Soil, 260, 291-299, doi:10.1023/B:PLSO.0000030179.02819.85, 2004.

Salisbury, F. B., and Ross, C. W.: Mineral nutrition. In: Plant Physiology, Wadsworth  
545 Publishing Company, Belmont, pp 116-135, 1992.

[Sardans, J., Peñuelas, J.: Potassium: a neglected nutrient in global change. Global  
Ecol. Biogeogr., 24, 261-275, doi:10.1111/geb.12259, 2015.](#)

Sharma, B. D., Arora, H., Kumar, R., and Nayyar, V. K.: Relationships between soil  
characteristics and total and DTPA-extractable micronutrients in Inceptisols of

- 550 Punjab. *Commun. Soil Sci. Plant Anal.*, 35, 799-818,  
doi:<http://dx.doi.org/10.1081/CSS-120030359>, 2004.
- Shen, C., Xiong, J., Zhang, H., Feng, Y., Lin, X., Li, X., Liang, W., and Chu, H.: Soil  
pH drives the spatial distribution of bacterial communities along elevation on  
Changbai Mountain. *Soil Biol. Biochem.*, 57, 204-211,  
555 doi:<http://dx.doi.org/10.1016/j.soilbio.2012.07.013>, 2013.
- Sinsabaugh, R. L., Lauber, C. L., Weintraub, M. N., Ahmed, B., Allison, S. D.,  
Crenshaw, C., Contosta, A. R., Cusack, D., Frey, S., Gallo, M. E., Gartner, T. B.,  
Hobbie, S. E., Holland, K., Keeler, B. L., Powers, J. S., Stursova, M.,  
Takacs-Vesbach, C., Waldrop, M. P., Wallenstein, M. D., Zak, D. R., and Zeglin, L.  
560 H.: Stoichiometry of soil enzyme activity at global scale. *Ecol. Lett.*, 11, 1252-1264,  
doi:[10.1111/j.1461-0248.2008.01245.x](https://doi.org/10.1111/j.1461-0248.2008.01245.x), 2008.
- Sollins, P., Kramer, M. G., Swanston, C., Lajtha, K., Filley, T., Aufdenkampe, A. K.,  
Wagai, R., and Bowden, R. D.: Sequential density fractionation across soils of  
contrasting mineralogy: evidence for both microbial-and mineral-controlled soil  
565 organic matter stabilization. *Biogeochemistry*, 96, 209-231,  
doi:[10.1007/s10533-009-9359-z](https://doi.org/10.1007/s10533-009-9359-z), 2009.
- Sun, T., Dong, L., Zhang, L., Wu, Z., Wang, Q., Li, Y., Zhang, H., and Wang, Z.: Early  
stage fine-root decomposition and its relationship with root order and soil depth in a  
*Larix gmelinii* plantation. *Forests*, 7, 234, doi:[10.3390/f7100234](https://doi.org/10.3390/f7100234), 2016.
- 570 Thébault, A., Clément, J. C., Ibanez, S., Roy, J., Geremia, R. A., Pérez, C. A., Buttler,  
A., Estienne, Y., and Lavorel, S.: Nitrogen limitation and microbial diversity at the

treeline. *Oikos*, 123, 729-740, doi:10.1111/j.1600-0706.2013.00860.x, 2014.

Tian, Q., Liu, N., Bai, W., Li, L., Chen, J., Reich, P. B., Yu, Q., Guo, D., Smith, M. D.,  
Knapp, A. K., Cheng, W., Lu, P., Gao, Y., Yang, A., Wang, T., Li, X., Wang, Z., Ma,  
575 Y., Han, X., and Zhang, W.: A novel soil manganese mechanism drives plant  
species loss with increased nitrogen deposition in a temperate steppe. *Ecology*, 97,  
65-74, doi:10.1890/15-0917.1, 2016.

van den Driessche, R.: Prediction of mineral nutrient status of trees by foliar analysis.  
*Bot. Rev.*, 40, 347-394, doi:10.1007/BF02860066, 1974.

580 van der Heijden, G., Dambrine, E., Pollier, B., Zeller, B., Ranger, J., and Legout, A.:  
Mg and Ca uptake by roots in relation to depth and allocation to aboveground  
tissues: results from an isotopic labeling study in a beech forest on base-poor  
soil. *Biogeochemistry*, 122, 375-393, doi:10.1007/s10533-014-0047-2, 2015.

Verbruggen, N., and Hermans, C.: Physiological and molecular responses to  
585 magnesium nutritional imbalance in plants. *Plant Soil*, 368, 87-99,  
doi:10.1007/s11104-013-1589-0, 2013.

Wang, R., Dungait, J. A. J., Creamer, C. A., Cai, J., Li, B., Xu, Z., Zhang, Y., Ma, Y.,  
and Jiang, Y.: Carbon and nitrogen dynamics in soil aggregates under long-term  
nitrogen and water addition in a temperate steppe. *Soil Sci. Soc. Am. J.*, 79,  
590 527-535, doi:10.2136/sssaj2014.09.0351, 2015.

Wang, R., Dungait, J. A. J., Buss, H. L., Yang, S., Zhang, Y., Xu, Z., and Jiang, Y.:  
Base cations and micronutrients in soil aggregates as affected by enhanced nitrogen  
and water inputs in a semi-arid steppe grassland. *Sci. Total Environ.*, 575, 564-572,

doi:<http://dx.doi.org/10.1016/j.scitotenv.2016.09.018>, 2017.

595 Weatherall, A., Proe, M. F., Craig, J., Cameron, A. D., and Midwood, A. J.: Internal cycling of nitrogen, potassium and magnesium in young Sitka spruce. *Tree Physiol.*, 26, 673-680, doi:<https://doi.org/10.1093/treephys/26.5.673>, 2006.

White, J. G., and Zasoski, R. J.: Mapping soil micronutrients. *Field Crop. Res.*, 60, 11-26, doi:[10.1093/aob/mcg164](https://doi.org/10.1093/aob/mcg164), 1999.

600 Welch, R. M., and Shuman, L.: Micronutrient nutrition of plants. *Crit. Rev. Plant Sci.*, 14, 49-82, doi:<http://dx.doi.org/10.1080/07352689509701922>, 1995.

Zhu, W., Xiang, J., Wang, S., and Li, M.-H.: Resprouting ability and mobile carbohydrate reserves in an oak shrubland decline with increasing elevation on the eastern edge of the Qinghai-Tibet Plateau. *Forest Ecol. Manag.*, 278, 118-126, doi:<https://doi.org/10.1016/j.foreco.2012.04.032>, 2012.

605 Zhu, W., Cao, M., Wang, S., Xiao, W., and Li, M.-H.: Seasonal dynamics of mobile carbon supply in *Quercus aquifolioides* at the upper elevational limit. *PLoS ONE*, 7, e34213, doi:<https://doi.org/10.1371/journal.pone.0034213>, 2012.

## Tables

610 **Table 1** Two-way ANOVAs ( $F$  values) of the effect of plant life form (L, tree or shrub), elevation position (E), and their interactions on soil pH, soil organic carbon (SOC), base cations and micronutrients in soils (exchangeable/available form) and plants (total) across sampling sites.

|         | soil<br>pH  | SOC         | soi<br>l<br>Ca | Soil<br>Mg | Soil<br>K   | leaf<br>Ca | root<br>Ca | shoo<br>t Ca | stem<br>Ca  | leaf<br>Mg  | root<br>Mg | Shoo<br>t Mg      | stem<br>Mg   | leaf<br>K         | roo<br>t K | shoo<br>t K | stem<br>K   | soil<br>Fe | soi<br>l<br>Mn | soil<br>Zn | leaf<br>Fe  | roo<br>t Fe | sho<br>ot<br>Fe | ste<br>m<br>Fe | leaf<br>Mn | root<br>Mn  | shoo<br>t Mn | stem<br>Mn  | leaf<br>Zn  | ro<br>ot<br>Zn | sho<br>ot<br>Zn | stem<br>Zn  |
|---------|-------------|-------------|----------------|------------|-------------|------------|------------|--------------|-------------|-------------|------------|-------------------|--------------|-------------------|------------|-------------|-------------|------------|----------------|------------|-------------|-------------|-----------------|----------------|------------|-------------|--------------|-------------|-------------|----------------|-----------------|-------------|
| L       | 0.18        | 5.75*       | 1.0<br>2       | 8.15<br>** | 24.6<br>4** | 9.74<br>** | 1.69       | 10.8<br>5**  | 39.3<br>6** | 93.4<br>1** | 8.35<br>** | 15.8<br>2**       | 118.5<br>8** | 12.5<br>7**       | 6.4<br>1*  | 63.5<br>6** | 87.0<br>0** | 8.72<br>** | 2.6<br>0       | 6.89<br>** | 64.6<br>7** | 0.7<br>2    | 0.1<br>2        | 8.54<br>**     | 0.03       | 27.0<br>5** | 40.6<br>7**  | 25.1<br>7** | 11.8<br>3** | 2.0<br>1       | 4.4<br>0*       | 80.6<br>0** |
| E       | 3.16*       | 10.1<br>2** | 1.2<br>2       | 1.71       | 15.2<br>1** | 7.82<br>** | 3.85       | 8.36*        | 1.17        | 0.83        | 5.85<br>** | 2.42              | 10.47<br>**  | 9.30 <sup>†</sup> | 0.2<br>2   | 0.48        | 0.85        | 5.75<br>** | 1.5<br>4       | 0.01       | 0.02        | 1.8<br>0    | 0.5<br>0        | 2.40           | 7.13<br>** | 2.63        | 1.54         | 0.53        | 0.67        | 0.7<br>1       | 1.6<br>7        | 3.61*       |
| L×<br>E | 15.5<br>7** | 3.34*       | 2.4<br>0       | 0.55       | 8.61*       | 2.24       | 8.55<br>** | 6.61*        | 1.11        | 1.82        | 7.20<br>** | 5.23 <sup>†</sup> | 0.37         | 0.96              | 1.0<br>1   | 2.20        | 2.84        | 0.10       | 1.6<br>9       | 4.42<br>** | 0.36        | 3.4<br>0*   | 3.7<br>3*       | 0.61           | 0.15       | 2.81        | 1.22         | 2.37        | 0.90        | 1.9<br>3       | 1.3<br>4        | 2.12        |

\* and \*\* indicate significant level at  $P < 0.05$  and  $0.01$ , respectively.

615 **Table 2** Regression statistics relating soil base cations and micronutrients to other soil physicochemical parameters under all trees and shrubs across three sampling sites.

The TN, C:N, TIN, and Olsen P represent soil total nitrogen, SOC to TN ratio, total inorganic nitrogen, and Olsen phosphorus.

|                              | Ca            | Mg             | K             | Fe             | Mn             | Zn             |
|------------------------------|---------------|----------------|---------------|----------------|----------------|----------------|
| pH                           | <b>0.94**</b> | <b>0.87**</b>  | -0.06         | <b>-0.64**</b> | <b>-0.36**</b> | <b>-0.73**</b> |
| SOC                          | 0.12          | 0.24*          | 0.18          | 0.30**         | 0.07           | <b>0.37**</b>  |
| TN                           | <b>0.39**</b> | <b>0.51**</b>  | 0.18          | <b>-0.01</b>   | 0.03           | 0.11           |
| C:N                          | -0.45**       | -0.44**        | -0.11         | <b>0.60**</b>  | <b>0.02</b>    | 0.44**         |
| NO <sub>3</sub> <sup>-</sup> | -0.24*        | <b>-0.29**</b> | <b>0.28**</b> | <b>-0.05</b>   | 0.02           | 0.08           |
| NH <sub>4</sub> <sup>+</sup> | -0.38**       | -0.33**        | -0.10         | 0.46**         | 0.15           | <b>0.63**</b>  |
| TIN                          | -0.38**       | -0.39**        | 0.19*         | 0.17           | 0.08           | 0.36**         |
| Olsen P                      | 0.10          | 0.18           | <b>0.49**</b> | -0.05          | 0.04           | 0.03           |

\* and \*\* indicate significant level at  $P < 0.05$  and  $0.01$ , respectively.

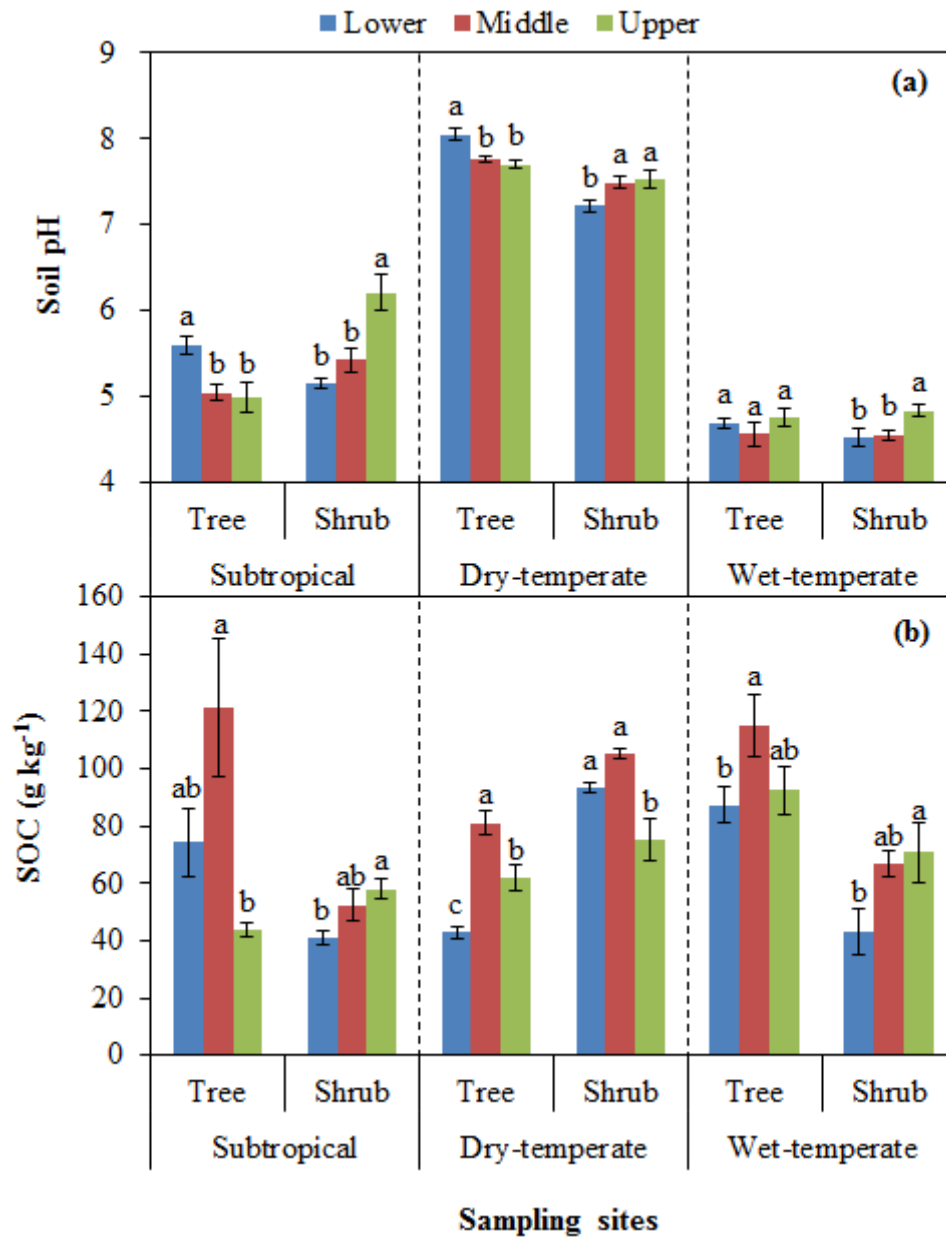

**Fig. 1** Soil pH values (a) and soil organic carbon (SOC) concentration (b) at lower and middle elevations as well as at the upper limit of treelines or shrublines for each of the three sites. Different letters indicate significant differences among three elevations within treeline or shrubline for each site.



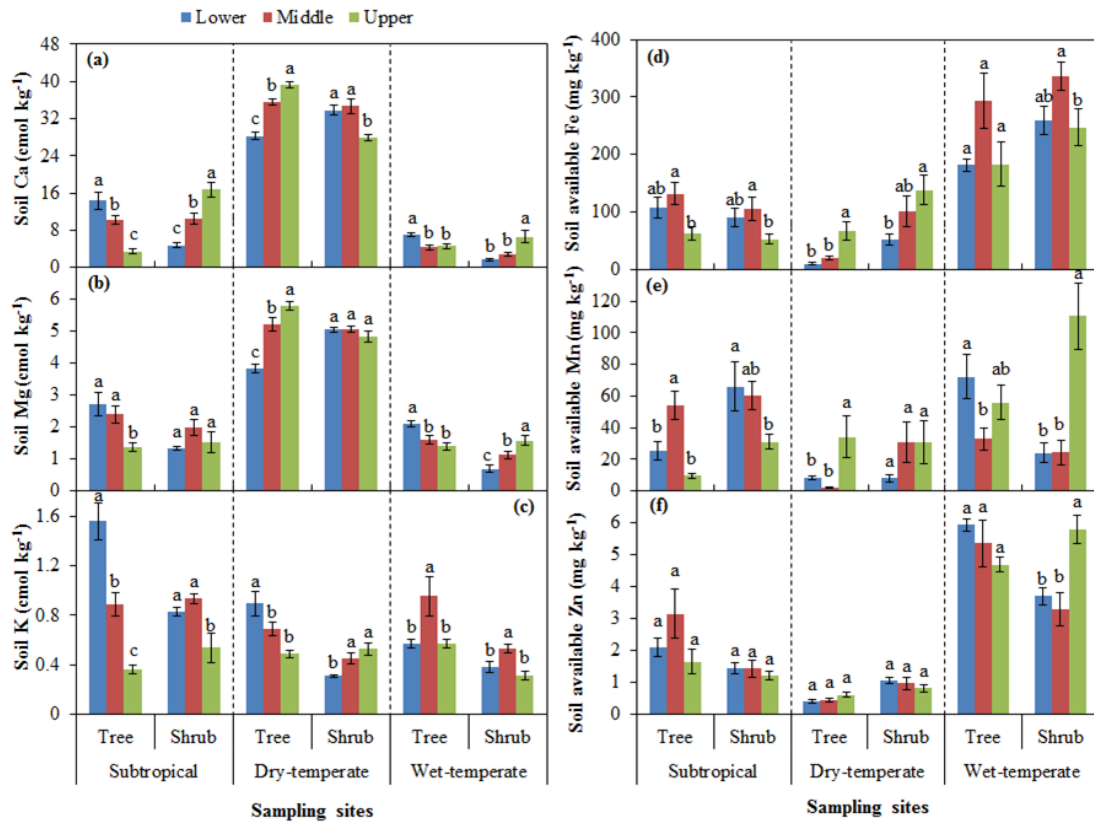

**Fig. 2** Concentrations of soil exchangeable base cations of Ca (a), Mg (b) and K (c)

630 and available micronutrients of Fe (d), Mn (e) and Zn (f) at lower and middle elevations as well as at the upper limit of trees or shrubs for each of the three sites.

Different letters indicate significant differences among three elevations within treeline or shrubline for each site.

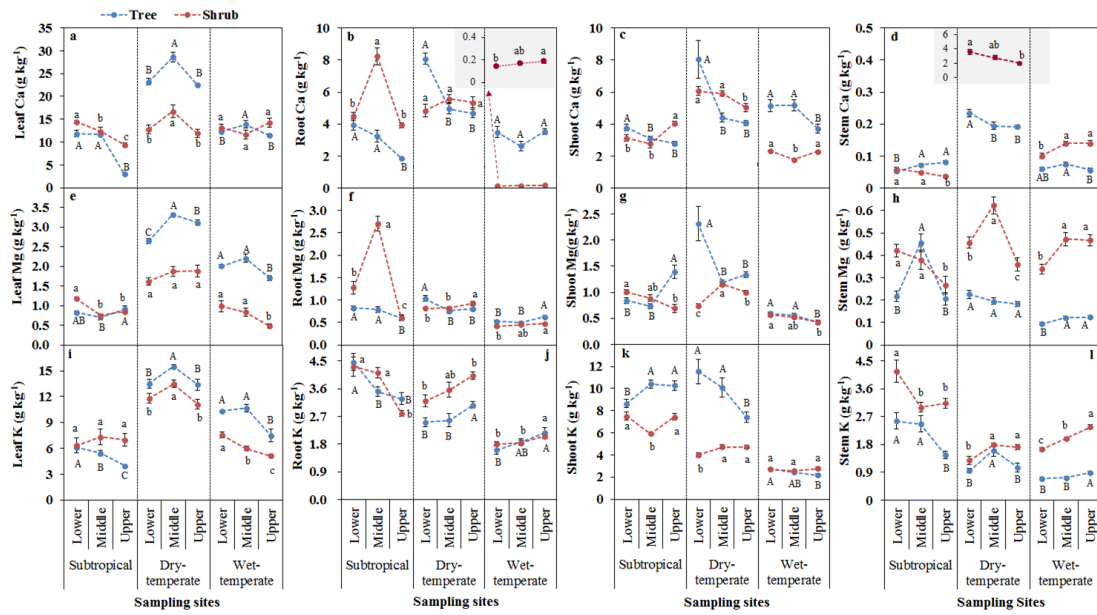

635

**Fig. 3** Base cation concentrations of Ca (a, b, c, d), Mg (e, f, g, h) and K (I, j, k, l) in plant tissues of leaf, root, shoot and stem sapwood at lower and middle elevations as well as at the upper limit of trees or shrubs for each of the three sites. Different letters indicate significant differences among three elevations within treeline or shrubline for each site.

640

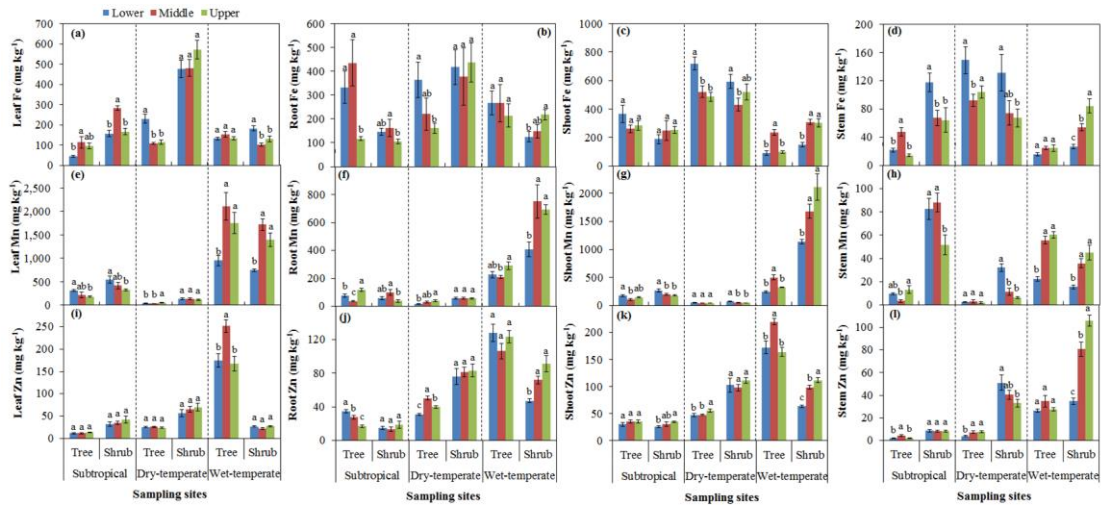

**Fig. 4** Micronutrient concentrations of Fe (a, b, c, d), Mn (e, f, g, h) and Zn (I, j, k, l) in plant tissues of leaf, root, shoot and stem sapwood at lower and middle elevations as well as at the upper limit of trees or shrubs for each of the three sites. Different letters indicate significant differences among three elevations within treeline or shrubline for each site.

645
